# Supplementary material
Source: Royal Society of Chemistry journal article supplement (doi:10.1039/d6ta03347d)
Supplement: d6ta03347d1.pdf [file d6ta03347d1.pdf]

## Supporting Information

# Transition metal atom doping engineering of two-dimensional pentagonal PtN<sub>2</sub>: a theoretical tri-functional electrocatalyst for OER, ORR, and HER

## Computational methods

For ORR and OER in acidic electrolyte, the reaction processes can be broken down into a reaction pathway involving four consecutive electron transfers, but the reaction direction is opposite [1]:

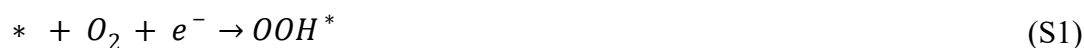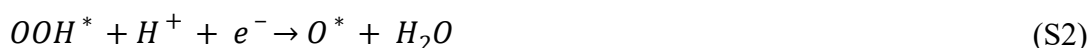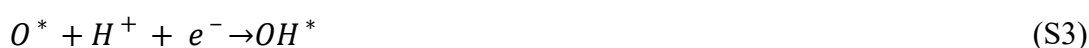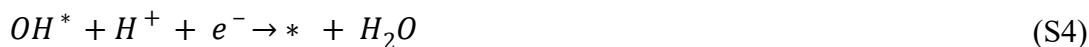

Herein, \* denotes the active sites on the catalyst surface, while O\*, OH\* and OOH\* correspond to three key intermediates involved throughout the entire reaction pathway.

The adsorption energy of the intermediate was calculated according to the following equation:

$$\Delta E_{O^*} = E_{O^*} - E_* - (E_{H_2O} - E_{H_2}) \quad (S5)$$

$$\Delta E_{OH^*} = E_{OH^*} - E_* - (E_{H_2O} - \frac{1}{2}E_{H_2}) \quad (S6)$$

$$\Delta E_{OOH^*} = E_{OOH^*} - E_* - (2E_{H_2O} - \frac{3}{2}E_{H_2}) \quad (S7)$$

where  $E_*$ ,  $E_{OH^*}$ ,  $E_{O^*}$ , and  $E_{OOH^*}$  represent the total energy of the catalyst separated and when catalyst combined with OH\*, O\*, and OOH\* respectively.

$E_{\text{H}_2\text{O}}$  and  $E_{\text{H}_2}$  denote the total energies of  $\text{H}_2\text{O}$  in the liquid and  $\text{H}_2$  molecules in the gas phase respectively.

The free energies  $\Delta G_i$  ( $\text{i}=\text{O}^*$ ,  $\text{OH}^*$ ,  $\text{OOH}^*$ ) of key intermediates were calculated based on theoretical hydrogen electrode (CHE) model [2]:

$$\Delta G_i = \Delta E_i + \Delta E_{\text{ZPE}} - T\Delta S + \Delta G_{\text{pH}} + \Delta G_U \quad (\text{S8})$$

where  $\Delta E_i$  represents the adsorption energy of the intermediate,  $\Delta E_{\text{ZPE}}$  denotes the zero-point energy correction,  $T$  is fixed at 298.15 K, and  $\Delta S$  corresponds to the entropy variation during the reaction process.  $\Delta G_{\text{pH}} = -k\text{B}T\ln(10) \cdot \text{pH}$ , We applies a PH value of 0, where  $\Delta G_{\text{pH}}$  denotes the free energy correction for  $\text{H}^+$  considering concentration effects. Additionally, the applied electrode potential contributes to the system via  $\Delta G_U = -eU$ . The free energy change of each step can be described as:

$$\Delta G_1 = \Delta G_{\text{OH}^*} \quad (\text{S9})$$

$$\Delta G_2 = \Delta G_{\text{O}^*} - \Delta G_{\text{OH}^*} \quad (\text{S10})$$

$$\Delta G_3 = \Delta G_{\text{OOH}^*} - \Delta G_{\text{O}^*} \quad (\text{S11})$$

$$\Delta G_4 = 4.92 - \Delta G_{\text{OOH}^*} \quad (\text{S12})$$

$$\Delta G_5 = \Delta G_{\text{OOH}^*} - 4.92 \quad (\text{S13})$$

$$\Delta G_6 = \Delta G_{\text{O}^*} - \Delta G_{\text{OOH}^*} \quad (\text{S14})$$

$$\Delta G_7 = \Delta G_{\text{OH}^*} - \Delta G_{\text{O}^*} \quad (\text{S15})$$

$$\Delta G_8 = -\Delta G_{\text{OH}^*} \quad (\text{S16})$$

Using the free energy data presented above, the overpotential for ORR and OER can be calculated by applying Equations (S17) and (S18):

$$\eta^{OER} = \frac{\max [\Delta G_1, \Delta G_2, \Delta G_3, \Delta G_4]}{e} - 1.23V \quad (S17)$$

$$\eta^{ORR} = \frac{\max [-\Delta G_1, -\Delta G_2, -\Delta G_3, -\Delta G_4]}{e} \quad (S18)$$

Define  $\eta$  to evaluate OER and ORR bifunctional electrocatalytic performance:

$$\eta^{OER + ORR} = \eta^{OER} + \eta^{ORR} \quad (S19)$$

In an acidic environment at pH=0, the HER reaction process is defined as:

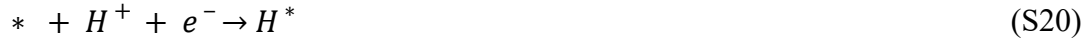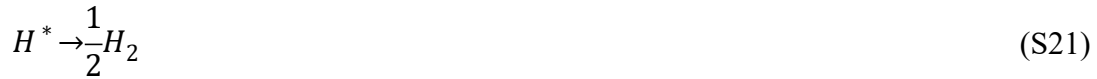

Gibbs free energy of hydrogen adsorption ( $\Delta G_{H^*}$ ) is a key indicator for evaluating HER, defined as:

$$\Delta G_H = \Delta E_{H^*} + \Delta E_{ZPE} - T\Delta S \quad (S22)$$

where  $\Delta E_{H^*}$  is the adsorption energy of hydrogen, with its definition given by:

$$\Delta E_{H^*} = E_{H^*} - E_* - \frac{1}{2}E_{H_2} \quad (S23)$$

where  $E_{H^*}$ ,  $E_*$  and  $E_{H_2}$  represent the total energy of H atoms adsorbed on the catalyst, the original catalyst and the  $H_2$  molecule respectively.

the overpotential of HER can be obtained using equation (20):

$$\eta^{HER} = \frac{-|\Delta G_{H^*}|}{e} \quad (S24)$$

To determine the stability of the doped system, the binding energy ( $E_{bind}$ ) and the cohesive energy ( $E_{coh}$ ) are calculated [3-4]:

$$E_{bind} = E_d - E_V - xE_{single} \quad (S25)$$

$$E_{coh} = (E_d - E_{TM} - aE_{Pt} - bE_N)/n \quad (S26)$$

Specifically,  $E_d$ ,  $E_v$  and  $E_{Single}$  are defined as the energies of the doped system, vacancy system, and individual dopant atom,  $x$  herein refers to the quantity of dopant atoms.

$E_{TM}$ ,  $E_{Pt}$ ,  $E_N$  are the energy of transition metal atoms, Pt atom and N atom, with  $n$  standing for the overall number of atoms in the studied system.

We define the dissolution potential ( $U_{diss}$ ) [5]:

$$U_{diss} = U_{diss}^0(metal,bulk) - \frac{E_{bind}}{ne} \quad (S27)$$

## References

- [1] T. Liu, J. Lu, Z. Chen, Z. Luo, Y. Ren, X. Zhuge, K. Luo, G. Ren, W. Lei, D. Liu, Chem. Eng. J. 496 (2024) 153719.
- [2] H. Xu, D. Cheng, D. Cao, X.C. Zeng, Nat. Catal. 1 (2018) 339–348.
- [3] X. Liu, Z. Gao, V. Wang, Z. Luo, B. Lv, Z. Ding, Z. Zhang, ACS Appl. Mater. Interfaces, 12 (2020) 17055–17061.
- [4] J. Hao, Y. Ma, B. Jia, X. Zhang, C. Zhang, Ge Wu, W. Chen, Y. Li, P. Lu, Int. J. Hydrogen Energy. 62 (2024) 462-272.
- [5] X. Guo, J. Gu, S. Lin, S. Zhang, Z. Chen, S. Huang, J. Am. Chem. Soc. 142 (2020) 5709–5721.

## Content includes:

**Fig. S1** Schematic diagram of using first principles calculations to screen potential tri-functional electrocatalysts.

**Fig. S2** Phonon spectra and electron local function(ELF) analysis of PtN<sub>2</sub> structure.

**Fig. S3** The AIMD simulation of TM/V<sub>Pt</sub>-PtN<sub>2</sub> in 298.15K aqueous solution(TM = Cr, Mn, Fe, Co, Ni, Cu, Zn, Nb, Mo, Tc, Ru, Rh, Pd, Ag, Ta, Os, Ir).

**Fig. S4** The adsorption free energies of intermediate species on the TM/V<sub>Pt</sub>-PtN<sub>2</sub>.

**Fig. S5** The volcano diagrams of OER corresponding to the TM/V<sub>Pt</sub>-PtN<sub>2</sub> systems.

**Fig. S6** The OER and ORR free energy diagrams for (a)Co/V<sub>Pt</sub>-PtN<sub>2</sub> (b)Rh/ V<sub>Pt</sub>-PtN<sub>2</sub>, and (c)Ir/V<sub>Pt</sub>-PtN<sub>2</sub> with(red) and without(blue) solvent effects.

**Fig. S7** The band structures of TM/V<sub>Pt</sub>-PtN<sub>2</sub> (TM = Cr, Fe, Co, Ni, Cu, Zn, Tc, Ru, Rh, Pd, Ag, Os, Ir).

**Table S1** Optimized lattice parameters of TM/V<sub>Pt</sub>-PtN<sub>2</sub> and different TM/V<sub>Pt</sub>-PtN<sub>2</sub> systems.

**Table S2** The optimized structures of OH\*, O\* and OOH\* intermediates on different

TM/V<sub>Pt</sub>-PtN<sub>2</sub> systems.

**Table S3** The Gibbs free energy of OH\*, O\* and OOH\* ( $\Delta G_{\text{OH}^*}$ ,  $\Delta G_{\text{O}^*}$  and  $\Delta G_{\text{OOH}^*}$ ) on the different TM/V<sub>Pt</sub>-PtN<sub>2</sub> systems.

**Table S4** The Gibbs free energy change between two intermediate processes, slab to OH\* ( $\Delta G_1$ ), OH\* to O\* ( $\Delta G_2$ ), O\* to OOH\* ( $\Delta G_3$ ) and OOH\* to O<sub>2</sub> ( $\Delta G_4$ ) of TM/V<sub>Pt</sub>-PtN<sub>2</sub> systems, as well as the corresponding OER overpotential ( $\eta^{\text{OER}}$ ) and ORR overpotential ( $\eta^{\text{ORR}}$ ).

**Table S5** The  $\eta$  of different TM/V<sub>Pt</sub>-PtN<sub>2</sub> structures.

**Table S6** The Gibbs free energy (G) of gas O<sub>2</sub> (g), H<sub>2</sub> (g) and H<sub>2</sub>O (l) at 1/0.035 bar and 298.15 K, E presents the free energy calculated from DFT, and  $\Delta E$  is the Frequency correction energy.

**Table S7** Binding energies ( $E_{\text{bind}}$ ) of TM/V<sub>Pt</sub>-PtN<sub>2</sub>, cohesive energies ( $E_{\text{coh}}$ ) of TM atoms in bulk, the standard dissolution potentials ( $U_{\text{diss-bulk}}$ ) of TM bulk, the number of transferred electrons (n) during the process of dissolution, and the calculated dissolution potentials ( $U_{\text{diss}}$ ) of TM atoms on TM/V<sub>Pt</sub>-PtN<sub>2</sub>.

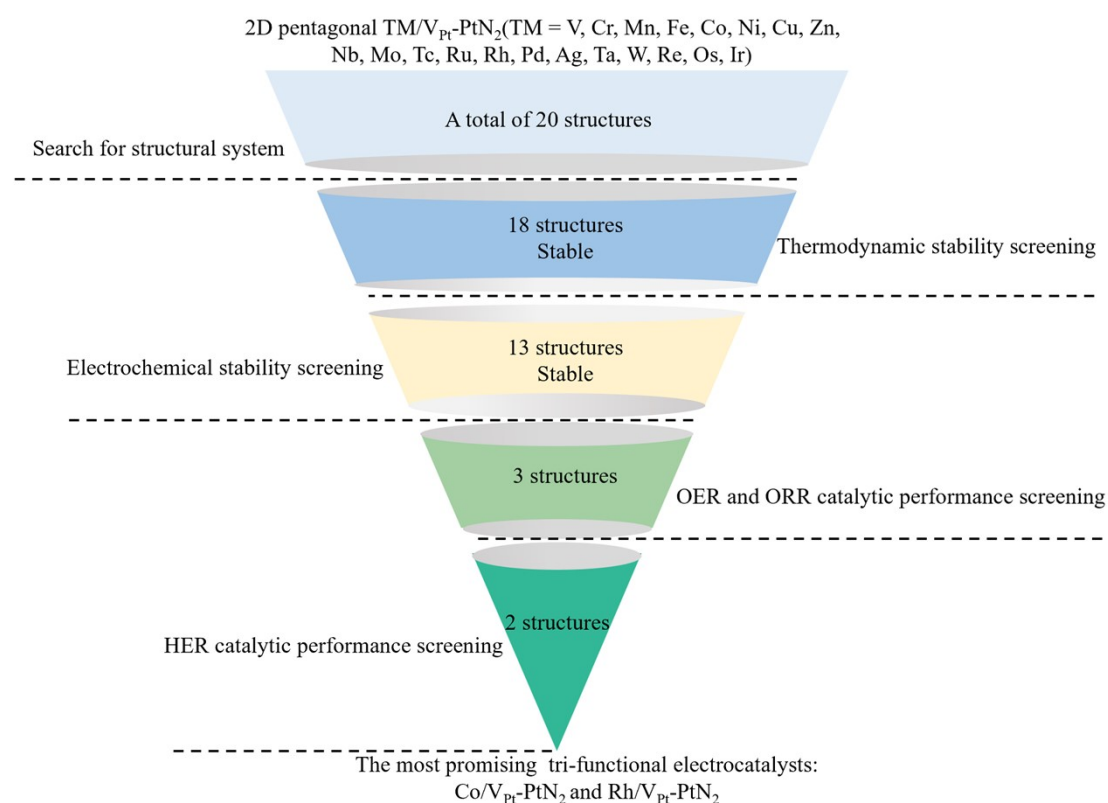

**Fig. S1** Schematic diagram of using first principles calculations to screen potential tri-functional electrocatalysts

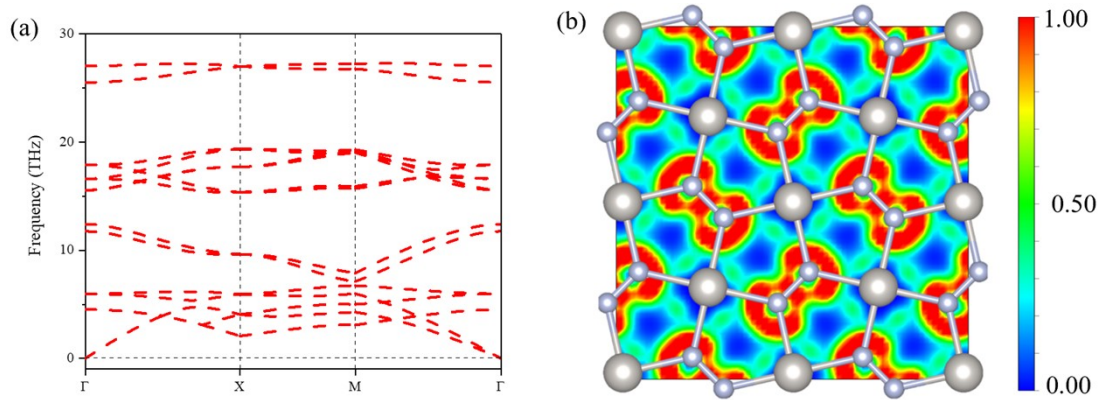

**Fig. S2** Phonon spectra and electron local function(ELF) analysis of PtN<sub>2</sub> structure.

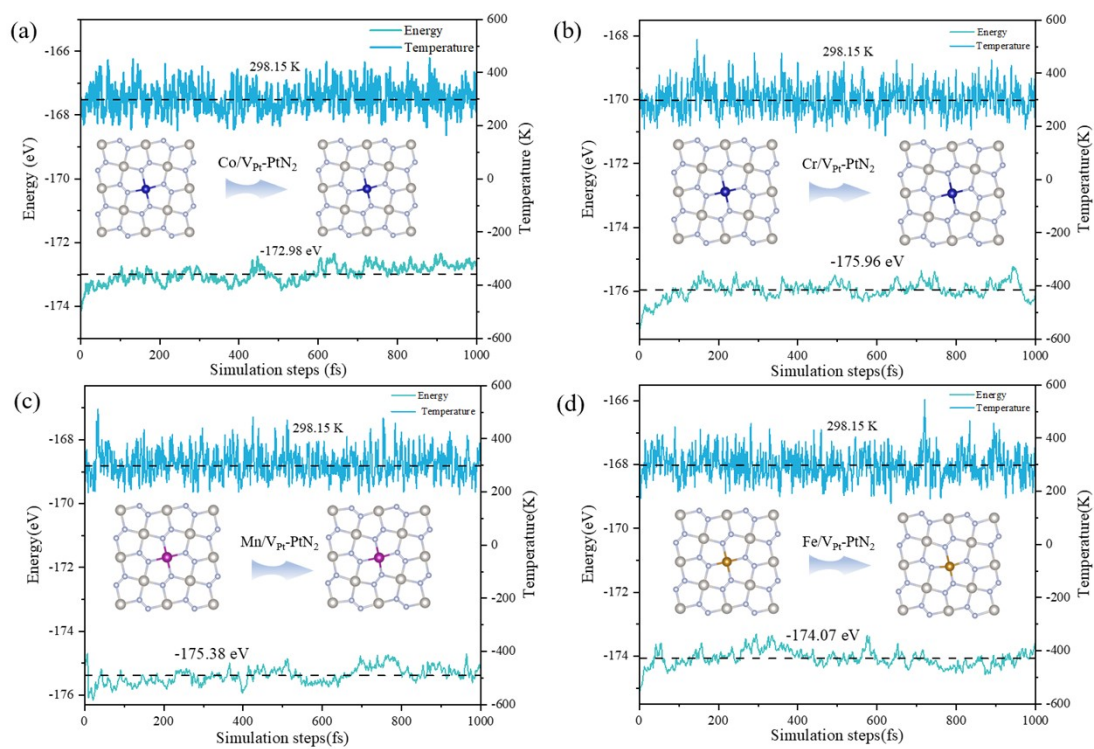

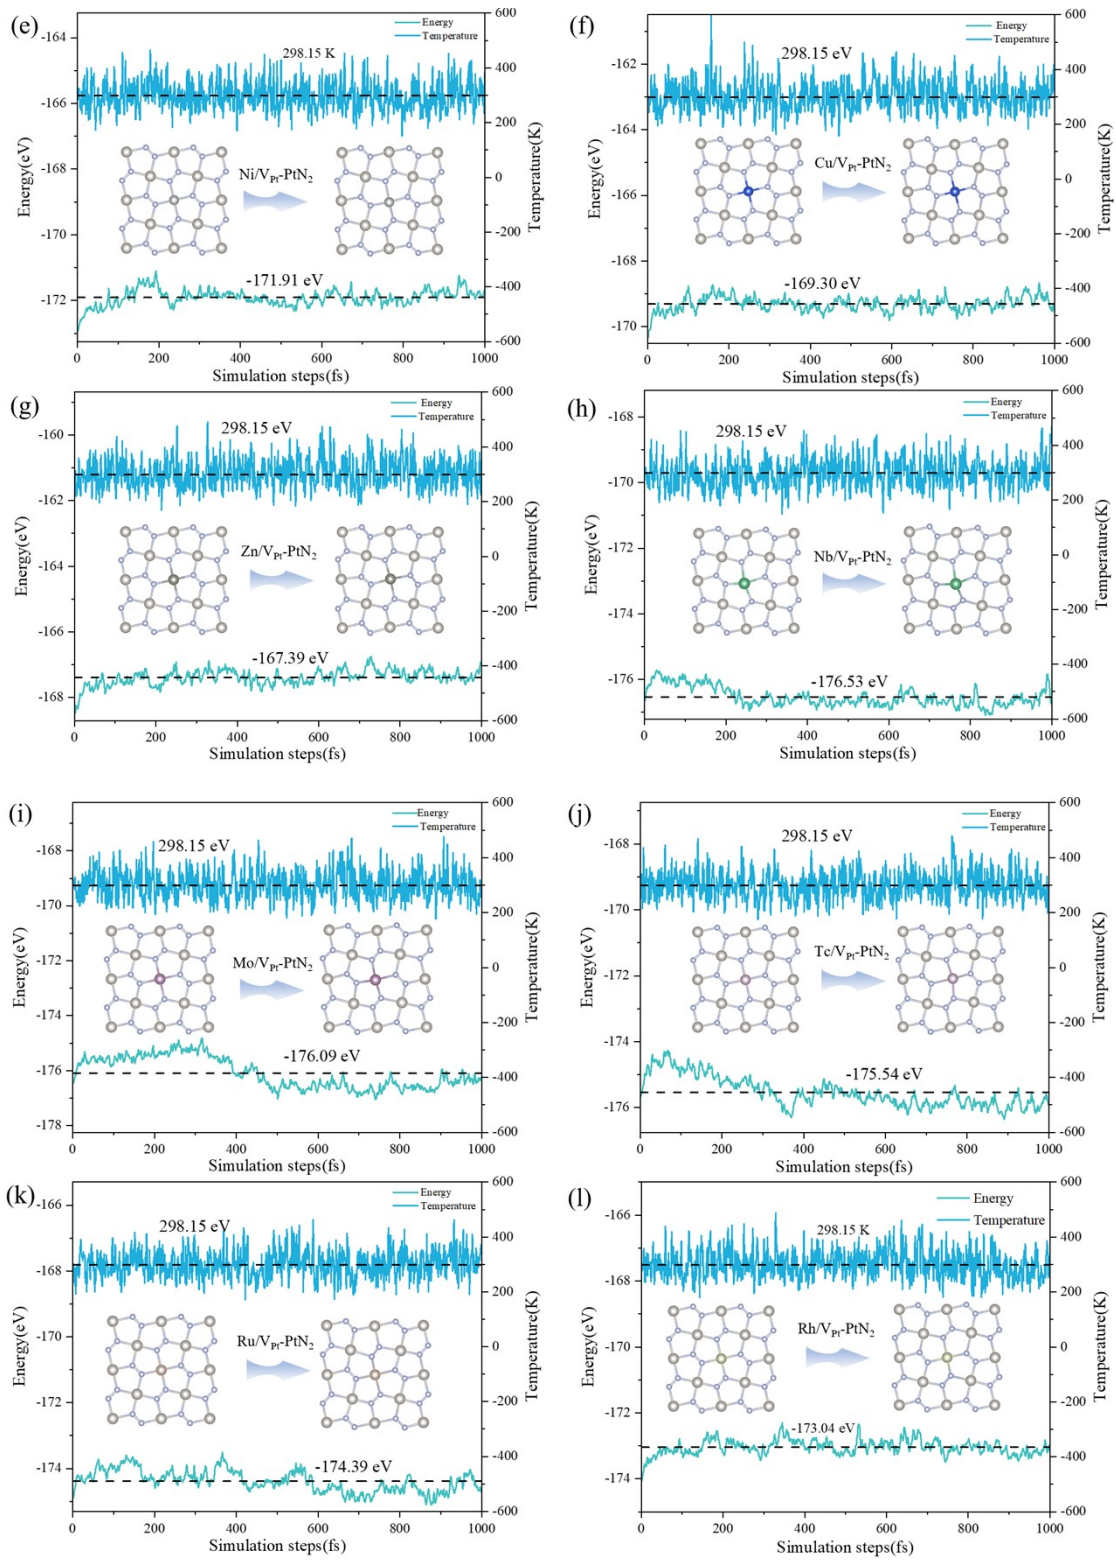

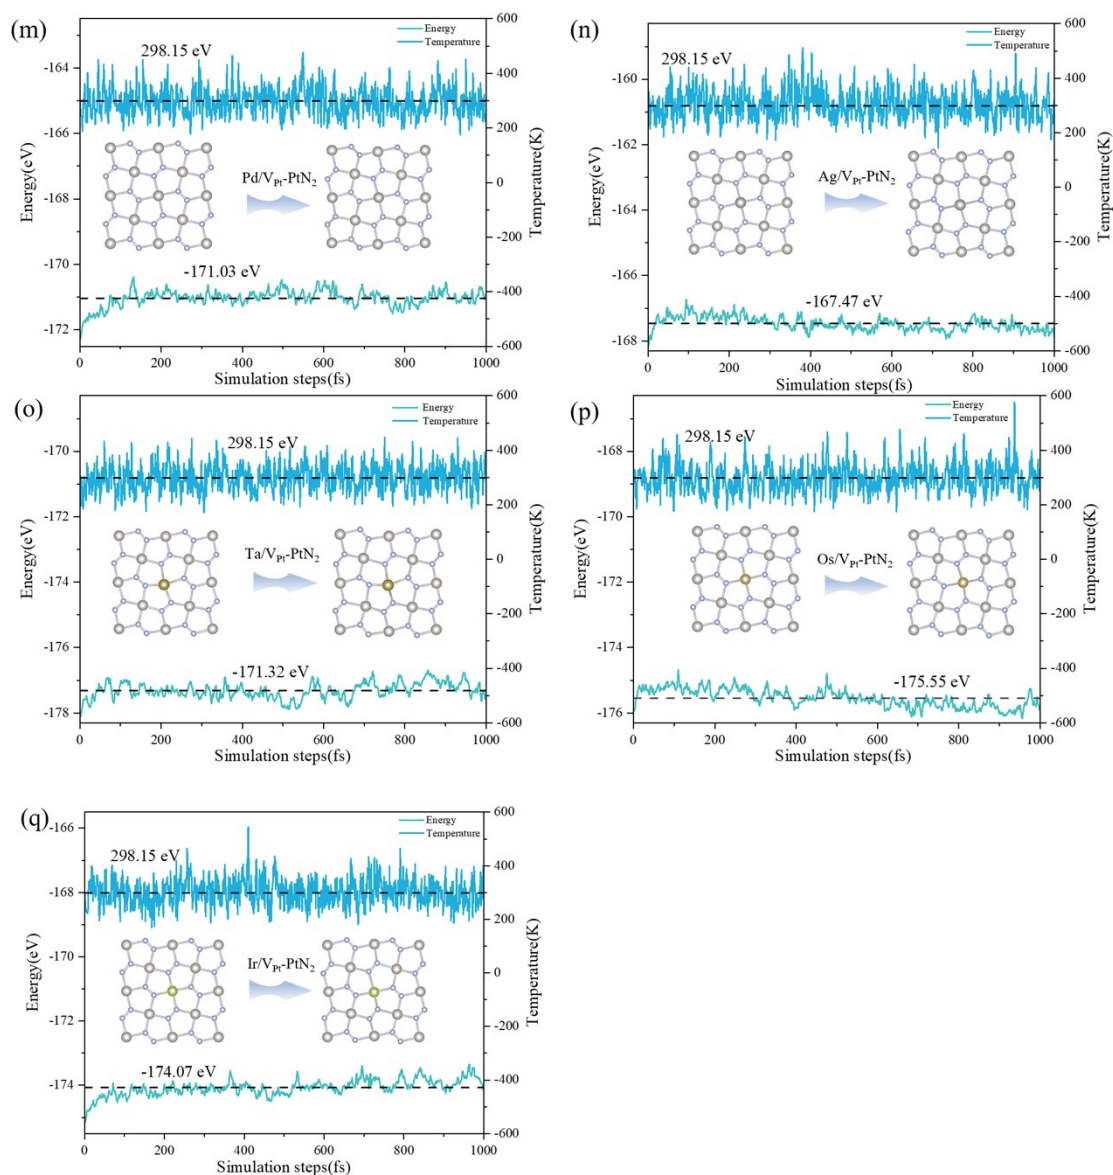

**Fig. S3** (a)Co/V<sub>Pt</sub>-PtN<sub>2</sub>, (b) Cr/V<sub>Pt</sub>-PtN<sub>2</sub>, (c)Mn/V<sub>Pt</sub>-PtN<sub>2</sub>, (d)Fe/V<sub>Pt</sub>-PtN<sub>2</sub>, (e) Ni/V<sub>Pt</sub>-PtN<sub>2</sub>, (f)Cu/V<sub>Pt</sub>-PtN<sub>2</sub>, (g)Zn/V<sub>Pt</sub>-PtN<sub>2</sub>, (h) Nb/V<sub>Pt</sub>-PtN<sub>2</sub>, (i)Mo/V<sub>Pt</sub>-PtN<sub>2</sub>, (j)Tc/V<sub>Pt</sub>-PtN<sub>2</sub>, (k) Ru/V<sub>Pt</sub>-PtN<sub>2</sub>, (l)Rh/V<sub>Pt</sub>-PtN<sub>2</sub>, (m)Pd/V<sub>Pt</sub>-PtN<sub>2</sub>, (n) Ag/V<sub>Pt</sub>-PtN<sub>2</sub>, (o)Ta/V<sub>Pt</sub>-PtN<sub>2</sub>, (o)Os/V<sub>Pt</sub>-PtN<sub>2</sub>, and (p)Ir/V<sub>Pt</sub>-PtN<sub>2</sub> AIMD simulation in 298.15K aqueous solution.

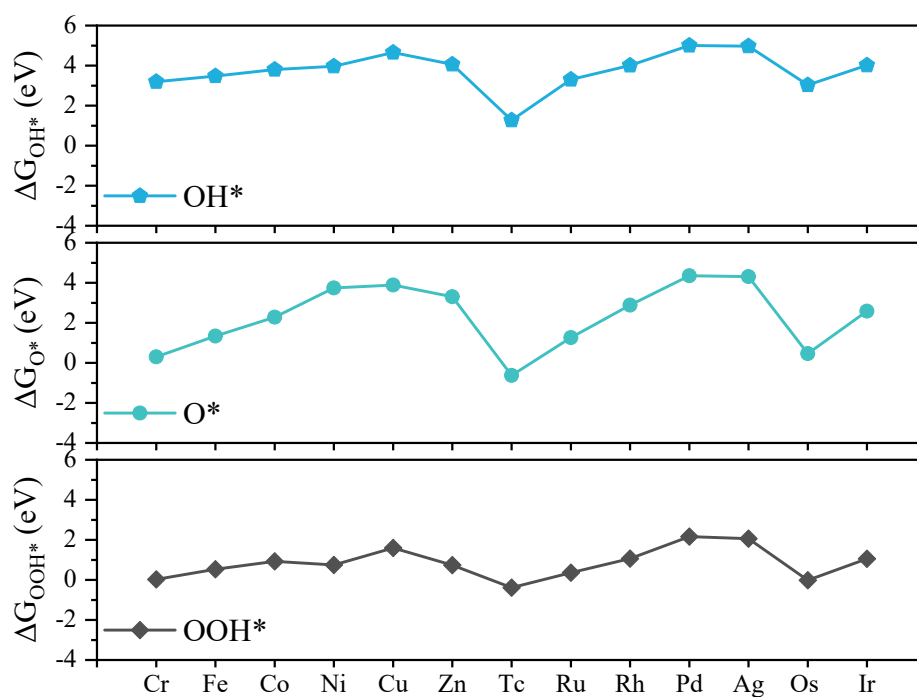

**Fig. S4** The adsorption free energies of intermediate species on the TM/V<sub>Pt</sub>-PtN<sub>2</sub>.

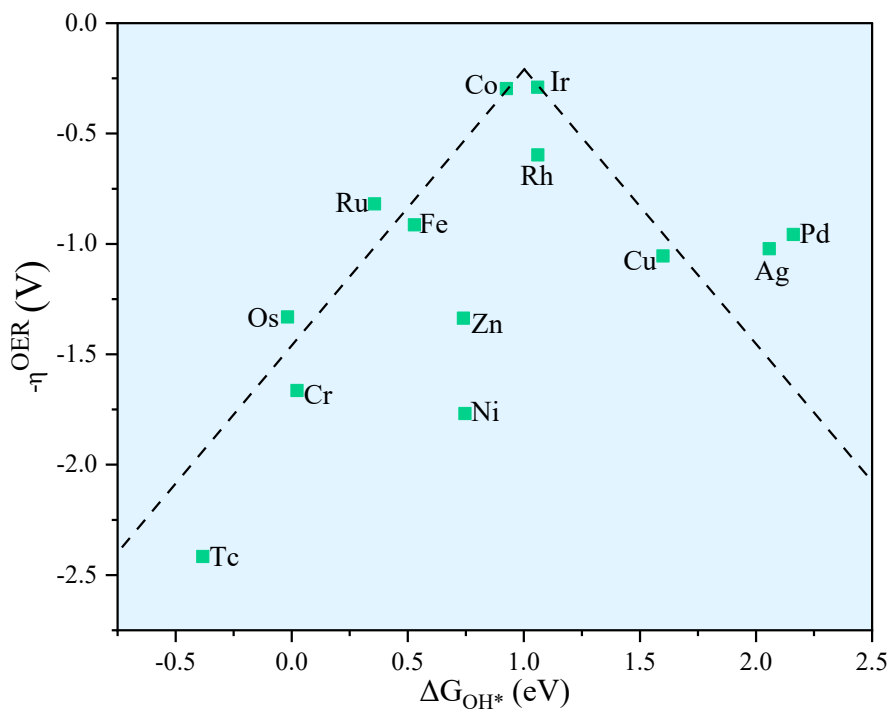

**Fig. S5** The volcano diagrams of OER corresponding to the TM/ $V_{Pt}$ -PtN<sub>2</sub> systems.

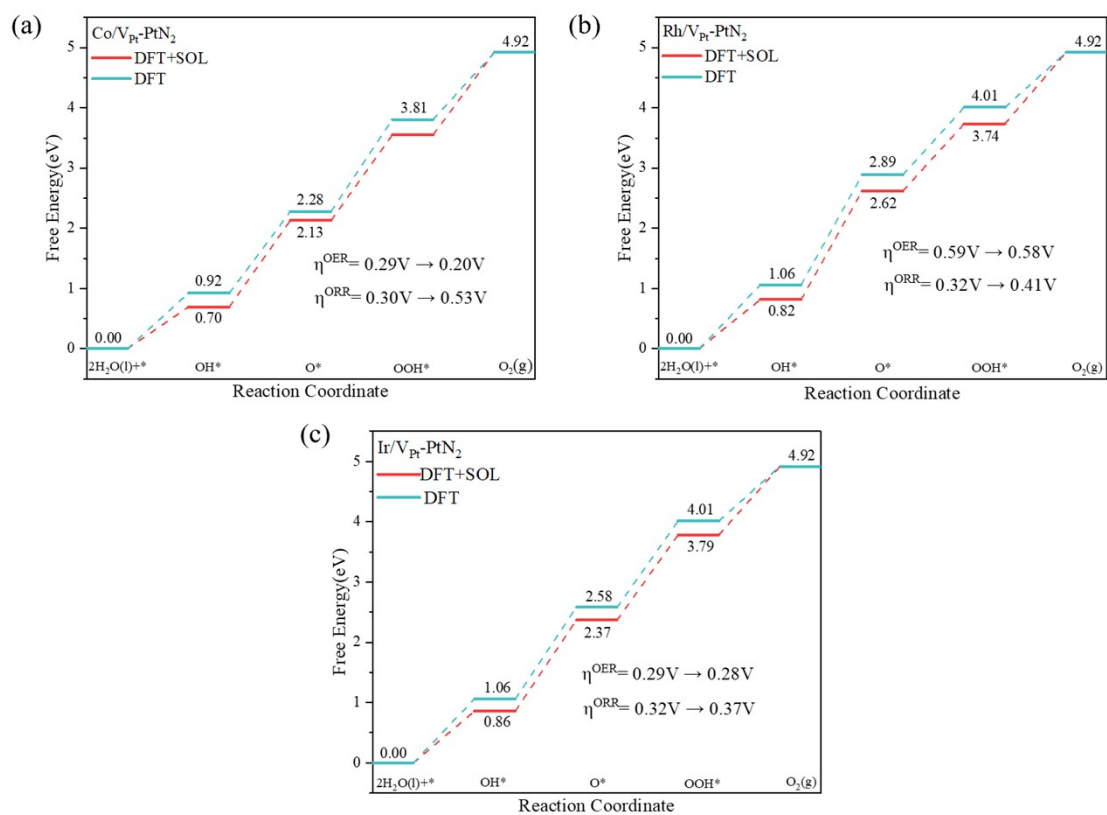

**Fig. S6** The OER and ORR free energy diagrams for (a)Co/ $V_{Pt}$ -PtN<sub>2</sub> (b)Rh/ $V_{Pt}$ -PtN<sub>2</sub> ,and (c)Ir/ $V_{Pt}$ -PtN<sub>2</sub> with(red) and without(blue) solvent effects.

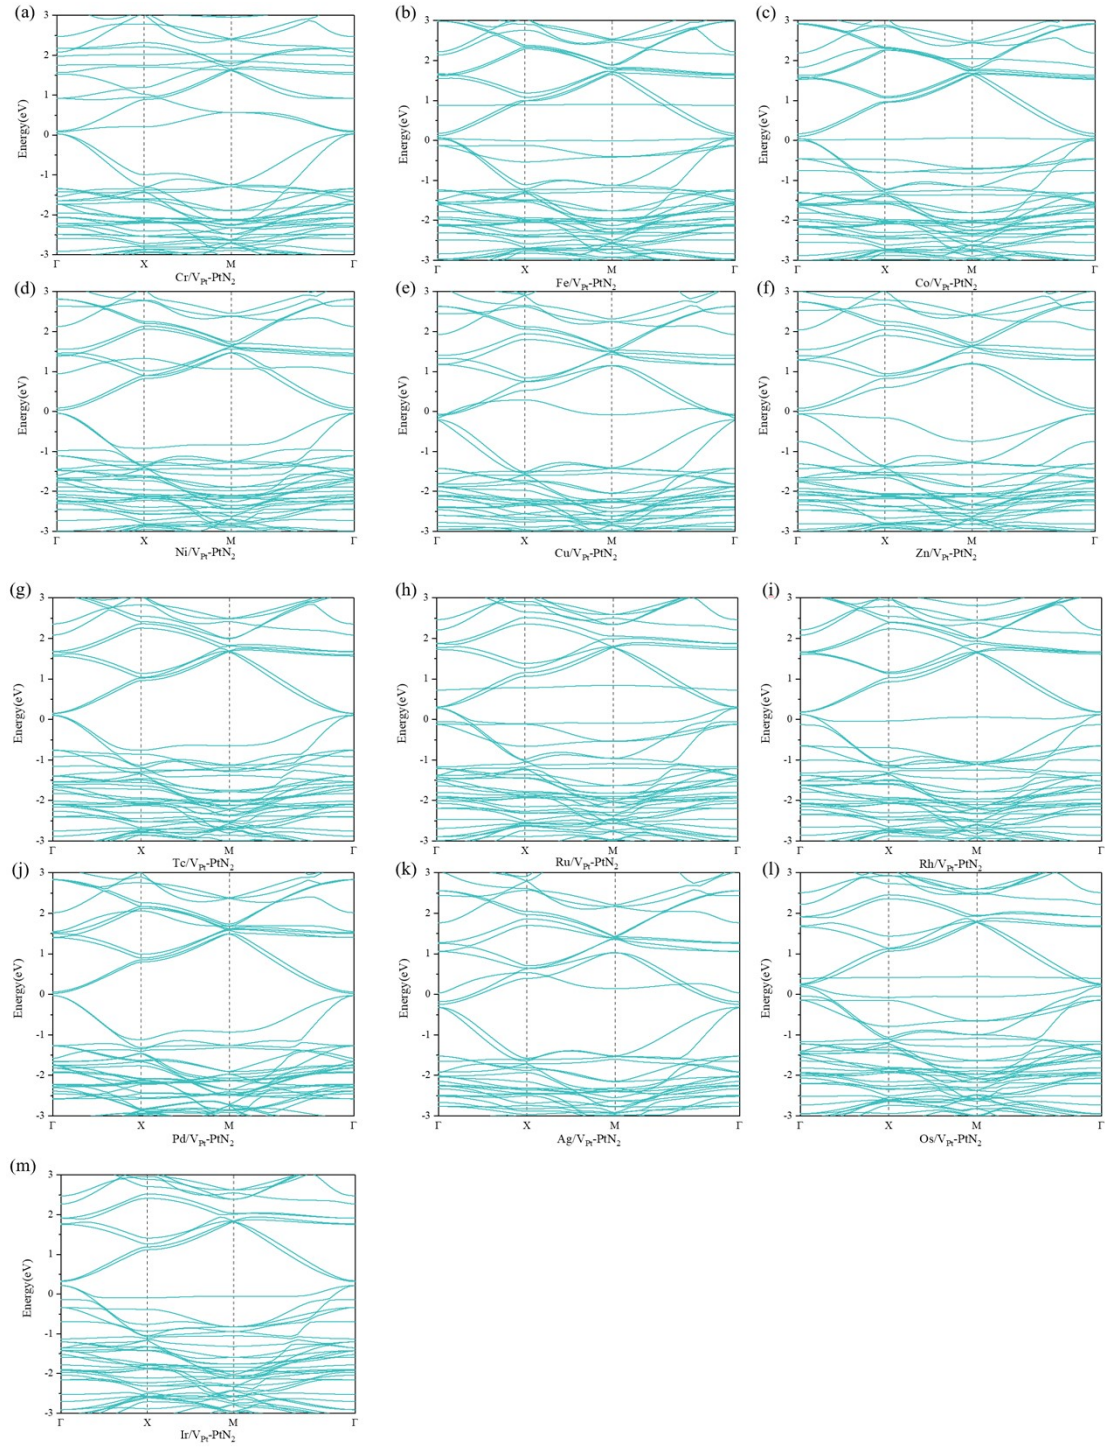

**Fig. S7** The band structures of TM/V<sub>Pt</sub>-PtN<sub>2</sub> (TM = Cr, Fe, Co, Ni, Cu, Zn, Tc, Ru, Rh, Pd, Ag, Os, Ir).

**Table S1** Optimized lattice parameters of TM/V<sub>Pt</sub>-PtN<sub>2</sub> and different TM/V<sub>Pt</sub>-PtN<sub>2</sub> systems.

| System                               | $a_0(\text{\AA})$ | $b_0(\text{\AA})$ | Average bond length( $\text{\AA}$ ) |
|--------------------------------------|-------------------|-------------------|-------------------------------------|
| PtN <sub>2</sub>                     | 9.65              | 9.65              | 2.02                                |
| V/V <sub>Pt</sub> -PtN <sub>2</sub>  | 9.68              | 9.65              | 2.03                                |
| Cr/V <sub>Pt</sub> -PtN <sub>2</sub> | 9.66              | 9.65              | 2.02                                |
| Mn/V <sub>Pt</sub> -PtN <sub>2</sub> | 9.62              | 9.65              | 1.99                                |
| Fe/V <sub>Pt</sub> -PtN <sub>2</sub> | 9.60              | 9.65              | 1.95                                |
| Co/V <sub>Pt</sub> -PtN <sub>2</sub> | 9.58              | 9.65              | 1.93                                |
| Ni/V <sub>Pt</sub> -PtN <sub>2</sub> | 9.58              | 9.65              | 1.94                                |
| Cu/V <sub>Pt</sub> -PtN <sub>2</sub> | 9.63              | 9.65              | 2.00                                |
| Zn/V <sub>Pt</sub> -PtN <sub>2</sub> | 9.69              | 9.65              | 2.05                                |
| Nb/V <sub>Pt</sub> -PtN <sub>2</sub> | 9.72              | 9.65              | 2.09                                |
| Mo/V <sub>Pt</sub> -PtN <sub>2</sub> | 9.73              | 9.65              | 2.07                                |
| Tc/V <sub>Pt</sub> -PtN <sub>2</sub> | 9.69              | 9.65              | 2.04                                |
| Ru/V <sub>Pt</sub> -PtN <sub>2</sub> | 9.68              | 9.65              | 2.01                                |
| Rh/V <sub>Pt</sub> -PtN <sub>2</sub> | 9.66              | 9.65              | 2.01                                |
| Pd/V <sub>Pt</sub> -PtN <sub>2</sub> | 9.66              | 9.65              | 2.03                                |
| Ag/V <sub>Pt</sub> -PtN <sub>2</sub> | 9.68              | 9.65              | 2.09                                |
| Ta/V <sub>Pt</sub> -PtN <sub>2</sub> | 9.71              | 9.65              | 2.08                                |
| Os/V <sub>Pt</sub> -PtN <sub>2</sub> | 9.68              | 9.65              | 2.00                                |
| Ir/V <sub>Pt</sub> -PtN <sub>2</sub> | 9.65              | 9.65              | 1.99                                |

**Table S2** The optimized structures of OH\*, O\* and OOH\* intermediates on different

TM/V<sub>Pt</sub>-PtN<sub>2</sub> systems.

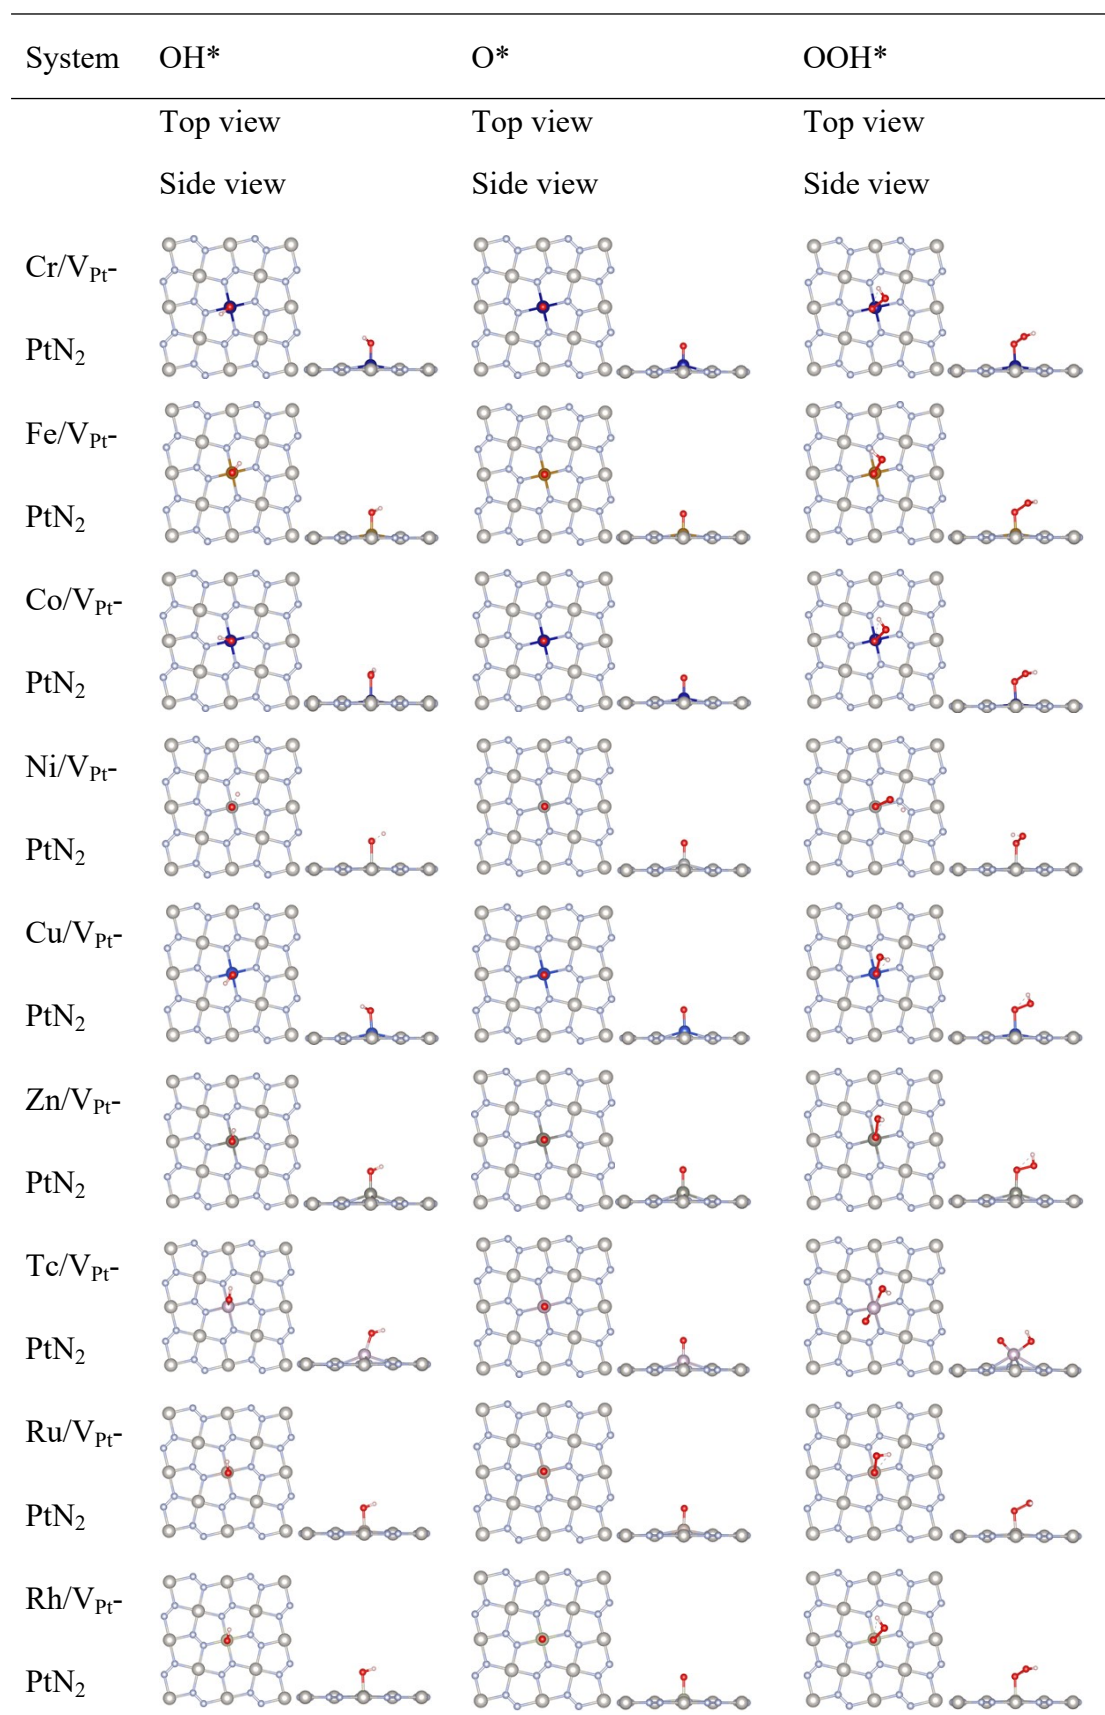

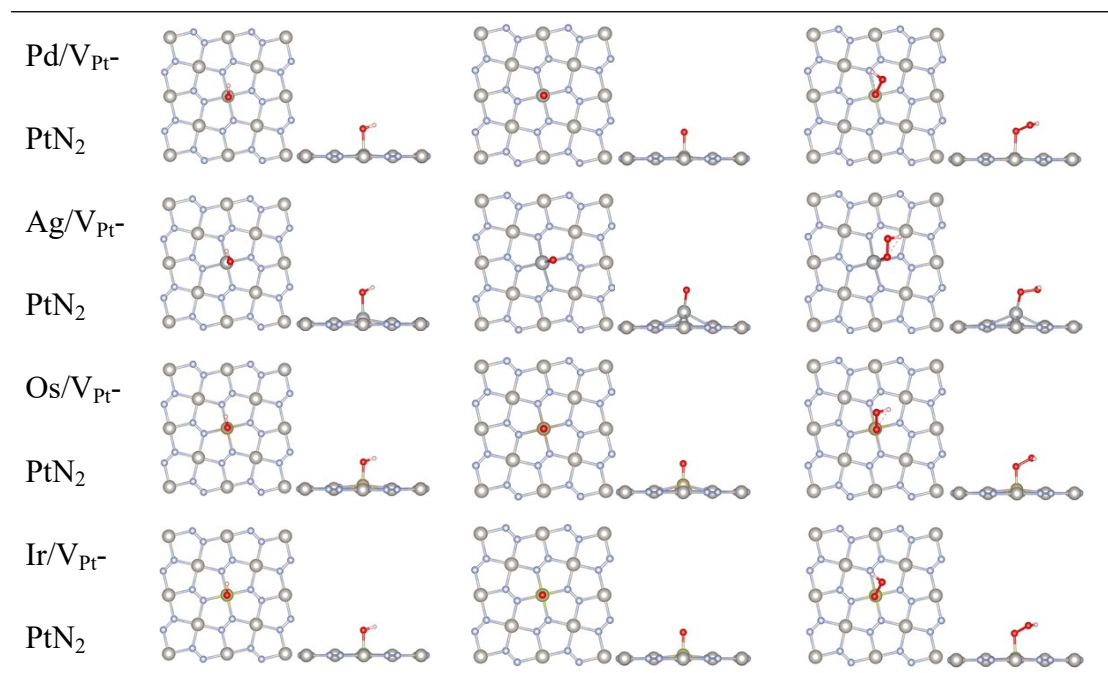

**Table S3** The Gibbs free energy of OH\*, O\* and OOH\* ( $\Delta G_{\text{OH}^*}$ ,  $\Delta G_{\text{O}^*}$  and  $\Delta G_{\text{OOH}^*}$ ) on the different TM/V<sub>Pt</sub>-PtN<sub>2</sub> systems.

| System                               | $\Delta G_{\text{OH}^*}$ (eV) | $\Delta G_{\text{O}^*}$ (eV) | $\Delta G_{\text{OOH}^*}$ (eV) |
|--------------------------------------|-------------------------------|------------------------------|--------------------------------|
| Cr/V <sub>Pt</sub> -PtN <sub>2</sub> | 0.02                          | 0.30                         | 3.19                           |
| Fe/V <sub>Pt</sub> -PtN <sub>2</sub> | 0.53                          | 1.34                         | 3.48                           |
| Co/V <sub>Pt</sub> -PtN <sub>2</sub> | 0.92                          | 2.28                         | 3.81                           |
| Ni/V <sub>Pt</sub> -PtN <sub>2</sub> | 0.75                          | 3.74                         | 3.97                           |
| Cu/V <sub>Pt</sub> -PtN <sub>2</sub> | 1.60                          | 3.88                         | 4.65                           |
| Zn/V <sub>Pt</sub> -PtN <sub>2</sub> | 0.74                          | 3.31                         | 4.06                           |
| Tc/V <sub>Pt</sub> -PtN <sub>2</sub> | -0.38                         | -0.63                        | 1.27                           |
| Ru/V <sub>Pt</sub> -PtN <sub>2</sub> | 0.36                          | 1.26                         | 3.31                           |
| Rh/V <sub>Pt</sub> -PtN <sub>2</sub> | 1.06                          | 2.89                         | 4.01                           |
| Pd/V <sub>Pt</sub> -PtN <sub>2</sub> | 2.16                          | 4.35                         | 5.01                           |

|                                      |       |      |      |
|--------------------------------------|-------|------|------|
| Ag/V <sub>Pt</sub> -PtN <sub>2</sub> | 2.06  | 4.31 | 4.97 |
| Os/V <sub>Pt</sub> -PtN <sub>2</sub> | -0.02 | 0.47 | 3.03 |
| Ir/V <sub>Pt</sub> -PtN <sub>2</sub> | 1.06  | 2.58 | 4.01 |

**Table S4** The Gibbs free energy change between two intermediate processes, slab to OH\* ( $\Delta G_1$ ), OH\* to O\* ( $\Delta G_2$ ), O\* to OOH\* ( $\Delta G_3$ ) and OOH\* to O<sub>2</sub> ( $\Delta G_4$ ) of TM/V<sub>Pt</sub>-PtN<sub>2</sub> systems, as well as the corresponding OER overpotential ( $\eta_{\text{OER}}$ ) and ORR overpotential ( $\eta_{\text{ORR}}$ ).

| System                               | $\Delta G_1(\text{eV})$ | $\Delta G_2(\text{eV})$ | $\Delta G_3(\text{eV})$ | $\Delta G_4(\text{eV})$ | $\eta_{\text{OER}}(\text{V})$ | $\eta_{\text{ORR}}(\text{V})$ |
|--------------------------------------|-------------------------|-------------------------|-------------------------|-------------------------|-------------------------------|-------------------------------|
| Cr/V <sub>Pt</sub> -PtN <sub>2</sub> | 0.02                    | 0.27                    | 2.89                    | 1.73                    | 1.66                          | 1.21                          |
| Fe/V <sub>Pt</sub> -PtN <sub>2</sub> | 0.53                    | 0.81                    | 2.14                    | 1.44                    | 0.91                          | 0.70                          |
| Co/V <sub>Pt</sub> -PtN <sub>2</sub> | 0.92                    | 1.36                    | 1.53                    | 1.11                    | 0.29                          | 0.30                          |
| Ni/V <sub>Pt</sub> -PtN <sub>2</sub> | 0.75                    | 3.00                    | 0.22                    | 0.95                    | 1.77                          | 1.01                          |
| Cu/V <sub>Pt</sub> -PtN <sub>2</sub> | 1.60                    | 2.29                    | 0.77                    | 0.27                    | 1.06                          | 0.96                          |
| Zn/V <sub>Pt</sub> -PtN <sub>2</sub> | 0.74                    | 2.57                    | 0.76                    | 0.86                    | 1.34                          | 0.49                          |
| Tc/V <sub>Pt</sub> -PtN <sub>2</sub> | -0.38                   | -0.25                   | 1.90                    | 3.65                    | 2.42                          | 1.61                          |

|                      |       |      |      |       |      |      |
|----------------------|-------|------|------|-------|------|------|
| PtN <sub>2</sub>     |       |      |      |       |      |      |
| Ru/V <sub>Pt</sub> - | 0.36  | 0.90 | 2.05 | 1.61  | 0.82 | 0.87 |
| PtN <sub>2</sub>     |       |      |      |       |      |      |
| Rh/V <sub>Pt</sub> - | 1.06  | 1.83 | 1.12 | 0.91  | 0.59 | 0.31 |
| PtN <sub>2</sub>     |       |      |      |       |      |      |
| Pd/V <sub>Pt</sub> - | 2.16  | 2.19 | 0.66 | -0.09 | 0.96 | 1.32 |
| PtN <sub>2</sub>     |       |      |      |       |      |      |
| Ag/V <sub>Pt</sub> - | 2.06  | 2.25 | 0.66 | -0.05 | 1.02 | 1.28 |
| PtN <sub>2</sub>     |       |      |      |       |      |      |
| Os/V <sub>Pt</sub> - | -0.02 | 0.48 | 2.56 | 1.89  | 1.33 | 1.25 |
| PtN <sub>2</sub>     |       |      |      |       |      |      |
| Ir/V <sub>Pt</sub> - | 1.06  | 1.52 | 1.43 | 0.91  | 0.29 | 0.32 |
| PtN <sub>2</sub>     |       |      |      |       |      |      |

**Table S5** The  $\eta$  of different TM/V<sub>Pt</sub>-PtN<sub>2</sub> structures.

| System                               | $\eta$ |
|--------------------------------------|--------|
| Cr/V <sub>Pt</sub> -PtN <sub>2</sub> | 2.87   |
| Mn/V <sub>Pt</sub> -PtN <sub>2</sub> | 3.42   |
| Fe/V <sub>Pt</sub> -PtN <sub>2</sub> | 1.61   |
| Co/V <sub>Pt</sub> -PtN <sub>2</sub> | 0.59   |
| Ni/V <sub>Pt</sub> -PtN <sub>2</sub> | 2.78   |
| Cu/V <sub>Pt</sub> -PtN <sub>2</sub> | 2.01   |

|                                      |      |
|--------------------------------------|------|
| Zn/V <sub>Pt</sub> -PtN <sub>2</sub> | 1.83 |
| Tc/V <sub>Pt</sub> -PtN <sub>2</sub> | 4.03 |
| Ru/V <sub>Pt</sub> -PtN <sub>2</sub> | 1.69 |
| Rh/V <sub>Pt</sub> -PtN <sub>2</sub> | 0.9  |
| Pd/V <sub>Pt</sub> -PtN <sub>2</sub> | 2.28 |
| Ag/V <sub>Pt</sub> -PtN <sub>2</sub> | 2.3  |
| Os/V <sub>Pt</sub> -PtN <sub>2</sub> | 2.58 |
| Ir/V <sub>Pt</sub> -PtN <sub>2</sub> | 0.61 |

**Table S6** The Gibbs free energy (G) of gas O<sub>2</sub>(g), H<sub>2</sub>(g) and H<sub>2</sub>O (l) at 1/0.035 bar and 298.15 K, E presents the free energy calculated from DFT, and  $\Delta E$  is the Frequency correction energy.

| Molecular           | Pressure/bar | Temperature/<br>K | E      | $\Delta E/eV$ | G/eV   |
|---------------------|--------------|-------------------|--------|---------------|--------|
| O <sub>2</sub> (g)  | 1            | 298.15            | --     | --            | -9.91  |
| H <sub>2</sub> (g)  | 1            | 298.15            | -6.76  | -0.045        | -6.8   |
| H <sub>2</sub> O(l) | 0.035        | 298.15            | -14.22 | -0.001        | -14.22 |

**Table S7** Binding energies ( $E_{\text{bind}}$ ) of TM/V<sub>Pt</sub>-PtN<sub>2</sub>, cohesive energies ( $E_{\text{coh}}$ ) of TM atoms in bulk, the standard dissolution potentials ( $U_{\text{diss-bulk}}$ ) of TM bulk, the number of transferred electrons (n) during the process of dissolution, and the calculated dissolution potentials ( $U_{\text{diss}}$ ) of TM atoms on TM/V<sub>Pt</sub>-PtN<sub>2</sub>.

| System | $E_{\text{bind}}$ (eV) | $E_{\text{coh}}$ (eV) | $U_{\text{diss-bulk}}$ (V) | n | $U_{\text{diss}}$ (V) |
|--------|------------------------|-----------------------|----------------------------|---|-----------------------|
|--------|------------------------|-----------------------|----------------------------|---|-----------------------|

|                                      |       |       |       |   |      |
|--------------------------------------|-------|-------|-------|---|------|
| Cr/V <sub>Pt</sub> -PtN <sub>2</sub> | -2.16 | -1.10 | -0.91 | 2 | 0.17 |
| Fe/V <sub>Pt</sub> -PtN <sub>2</sub> | -1.76 | -1.08 | -0.45 | 2 | 0.43 |
| Co/V <sub>Pt</sub> -PtN <sub>2</sub> | -2.06 | -1.10 | -0.28 | 2 | 0.75 |
| Ni/V <sub>Pt</sub> -PtN <sub>2</sub> | -2.26 | -1.10 | -0.26 | 2 | 0.87 |
| Cu/V <sub>Pt</sub> -PtN <sub>2</sub> | -1.18 | -1.06 | 0.34  | 2 | 0.93 |
| Zn/V <sub>Pt</sub> -PtN <sub>2</sub> | -1.93 | -1.09 | -0.76 | 2 | 0.20 |
| Tc/V <sub>Pt</sub> -PtN <sub>2</sub> | -0.01 | -1.01 | 0.30  | 2 | 0.30 |
| Ru/V <sub>Pt</sub> -PtN <sub>2</sub> | -0.84 | -1.04 | 0.46  | 2 | 0.88 |
| Rh/V <sub>Pt</sub> -PtN <sub>2</sub> | -1.79 | -1.08 | 0.60  | 2 | 1.50 |
| Pd/V <sub>Pt</sub> -PtN <sub>2</sub> | -2.13 | -1.10 | 0.95  | 2 | 2.02 |
| Ag/V <sub>Pt</sub> -PtN <sub>2</sub> | -0.53 | -1.03 | 0.80  | 1 | 1.33 |
| W/V <sub>Pt</sub> -PtN <sub>2</sub>  | 0.14  | -     | -     | - | -    |
| Os/V <sub>Pt</sub> -PtN <sub>2</sub> | -0.07 | -1.01 | 0.84  | 8 | 0.85 |
| Ir/V <sub>Pt</sub> -PtN <sub>2</sub> | -1.63 | -1.08 | 1.16  | 3 | 1.70 |

**Table S8** Atomic lattices in VASP POSCAR format

|                     |                     |                    |
|---------------------|---------------------|--------------------|
| PtN2                |                     |                    |
| 1.0000000000000000  |                     |                    |
| 9.6506923828323981  | -0.0000000000000000 | 0.0000000000000000 |
| -0.0000000000000000 | 9.6506923828323981  | 0.0000000000000000 |
| 0.0000000000000000  | 0.0000000000000000  | 20                 |
| Pt                  | N                   |                    |
| 8                   | 16                  |                    |
| Direct              |                     |                    |
| -0.0000000000000000 | 0.0000000000000000  | 0.5000000000000000 |
| -0.0000000000000000 | 0.5000000000259490  | 0.5000000000000000 |
| 0.5000000000259490  | 0.0000000000000000  | 0.5000000000000000 |
| 0.5000000000259490  | 0.5000000000259490  | 0.5000000000000000 |
| 0.2500000000129745  | 0.2500000000129745  | 0.5000000000000000 |
| 0.2500000000129745  | 0.7500000000389306  | 0.5000000000000000 |

---

|                    |                    |                    |
|--------------------|--------------------|--------------------|
| 0.7500000000389306 | 0.2500000000129745 | 0.5000000000000000 |
| 0.7500000000389306 | 0.7500000000389306 | 0.5000000000000000 |
| 0.4538570767187008 | 0.2038571064980016 | 0.5000000000000000 |
| 0.4538570767187008 | 0.7038571363162259 | 0.5000000000000000 |
| 0.9538570767446569 | 0.2038571064980016 | 0.5000000000000000 |
| 0.9538570767446569 | 0.7038571363162259 | 0.5000000000000000 |
| 0.0461429046221983 | 0.2961428935279474 | 0.5000000000000000 |
| 0.0461429046221983 | 0.7961428636578251 | 0.5000000000000000 |
| 0.5461429233331972 | 0.2961428935279474 | 0.5000000000000000 |
| 0.5461429233331972 | 0.7961428636578251 | 0.5000000000000000 |
| 0.2961428935279474 | 0.4538570767187008 | 0.5000000000000000 |
| 0.2961428935279474 | 0.9538570767446569 | 0.5000000000000000 |
| 0.7961428636578251 | 0.4538570767187008 | 0.5000000000000000 |
| 0.7961428636578251 | 0.9538570767446569 | 0.5000000000000000 |
| 0.2038571064980016 | 0.0461429046221983 | 0.5000000000000000 |
| 0.2038571064980016 | 0.5461429233331972 | 0.5000000000000000 |
| 0.7038571363162259 | 0.0461429046221983 | 0.5000000000000000 |
| 0.7038571363162259 | 0.5461429233331972 | 0.5000000000000000 |

---

V/VPt-PtN2

1.0000000000000000

|                    |                    |                     |
|--------------------|--------------------|---------------------|
| 9.6837637038422208 | 0.0000000000000000 | 0.0000000000000000  |
| 0.0000000000000000 | 9.6506996155000007 | 0.0000000000000000  |
| 0.0000000000000000 | 0.0000000000000000 | 20.0000000000000000 |

Pt    N    V  
7    16    1

Direct

|                     |                     |                    |
|---------------------|---------------------|--------------------|
| 0.0007302926199553  | 0.0003795589220639  | 0.5000000000000000 |
| -0.0010387184917848 | 0.5001989118175701  | 0.5000000000000000 |
| 0.5006808683616049  | -0.0013297564480012 | 0.5000000000000000 |
| 0.2509855697275281  | 0.2506619486680331  | 0.5000000000000000 |
| 0.2499814756556370  | 0.7499088973375344  | 0.5000000000000000 |
| 0.7504770701575086  | 0.2493411061806322  | 0.5000000000000000 |
| 0.7501185342185139  | 0.7494365815635493  | 0.5000000000000000 |
| 0.4553301323702751  | 0.2013160782770455  | 0.5000000000000000 |
| 0.4551323283963607  | 0.7029297368398431  | 0.5000000000000000 |
| 0.9550978231753350  | 0.2042240924497390  | 0.5000000000000000 |
| 0.9538926351535710  | 0.7044511099398653  | 0.5000000000000000 |
| 0.0469054031907386  | 0.2962895891446875  | 0.5000000000000000 |
| 0.0457667996651881  | 0.7963565751973298  | 0.5000000000000000 |
| 0.5481465066209196  | 0.2930000243317169  | 0.5000000000000000 |
| 0.5460071471231671  | 0.7958651014213619  | 0.5000000000000000 |
| 0.2937559207310359  | 0.4560951086067365  | 0.5000000000000000 |
| 0.2965090491440865  | 0.9537584062595953  | 0.5000000000000000 |

---

---

|                    |                    |                    |
|--------------------|--------------------|--------------------|
| 0.7962287680610634 | 0.4544876212758110 | 0.5000000000000000 |
| 0.7969316291693608 | 0.9538469228486718 | 0.5000000000000000 |
| 0.2047809264698485 | 0.0458284512574459 | 0.5000000000000000 |
| 0.2004068323626534 | 0.5467754797150688 | 0.5000000000000000 |
| 0.7048380061952347 | 0.0454415323448682 | 0.5000000000000000 |
| 0.7035786456294275 | 0.5459155114696402 | 0.5000000000000000 |
| 0.4960163367227204 | 0.4949614166625627 | 0.5000000000000000 |

---

Cr/VPt-PtN2

1.0000000000000000

|                    |                    |                     |
|--------------------|--------------------|---------------------|
| 9.6606401418152696 | 0.0000000000000000 | 0.0000000000000000  |
| 0.0000000000000000 | 9.6506996155000007 | 0.0000000000000000  |
| 0.0000000000000000 | 0.0000000000000000 | 20.0000000000000000 |

Pt N Cr  
7 16 1

Direct

|                    |                     |                    |
|--------------------|---------------------|--------------------|
| 0.0000711683932516 | -0.0004644038781549 | 0.5000000000000000 |
| 0.0000702406341942 | 0.4995290785017888  | 0.5000000000000000 |
| 0.5000515530214193 | -0.0005465353693864 | 0.5000000000000000 |
| 0.2503751787499570 | 0.2500404071275091  | 0.5000000000000000 |
| 0.2503894645787240 | 0.7493179848132394  | 0.5000000000000000 |
| 0.7496414409212390 | 0.2499786582982026  | 0.5000000000000000 |
| 0.7497120829981783 | 0.7492814021281625  | 0.5000000000000000 |
| 0.4543659609001524 | 0.2029176449490450  | 0.5000000000000000 |
| 0.4538861699327486 | 0.7035165493307638  | 0.5000000000000000 |
| 0.9541585360797749 | 0.2034671441895524  | 0.5000000000000000 |
| 0.9537425240106603 | 0.7035370224277415  | 0.5000000000000000 |
| 0.0463488776456917 | 0.2956832783287508  | 0.5000000000000000 |
| 0.0459393872380922 | 0.7957418150026623  | 0.5000000000000000 |
| 0.5461759730204075 | 0.2955229265532498  | 0.5000000000000000 |
| 0.5457056495617181 | 0.7961147963591636  | 0.5000000000000000 |
| 0.2960738459573143 | 0.4535135149845174  | 0.5000000000000000 |
| 0.2961542223063752 | 0.9533357747409771  | 0.5000000000000000 |
| 0.7967462128161127 | 0.4539530004877652  | 0.5000000000000000 |
| 0.7962194885248127 | 0.9537703000420291  | 0.5000000000000000 |
| 0.2039021104634626 | 0.0455216795253165  | 0.5000000000000000 |
| 0.2034035835397658 | 0.5452869989004597  | 0.5000000000000000 |
| 0.7039395841315484 | 0.0459242964035139  | 0.5000000000000000 |
| 0.7040868857037406 | 0.5457348586073889  | 0.5000000000000000 |
| 0.5000998413006090 | 0.4994618136291140  | 0.5000000000000000 |

---

Mn/VPt-PtN2

1.0000000000000000

|                    |                    |                    |
|--------------------|--------------------|--------------------|
| 9.6191382395667411 | 0.0000000000000000 | 0.0000000000000000 |
|--------------------|--------------------|--------------------|

---

---

|                    |                     |                     |
|--------------------|---------------------|---------------------|
| 0.0000000000000000 | 9.650699615500007   | 0.0000000000000000  |
| 0.0000000000000000 | 0.0000000000000000  | 20.0000000000000000 |
| Pt                 | N                   | Mn                  |
| 7                  | 16                  | 1                   |
| Direct             |                     |                     |
| 0.0000795605534246 | -0.0002770920221862 | 0.5000000000000000  |
| 0.0001133945437928 | 0.4995171291082887  | 0.5000000000000000  |
| 0.4999980421504163 | -0.0006802254250258 | 0.5000000000000000  |
| 0.2511838625910668 | 0.2496941720079210  | 0.5000000000000000  |
| 0.2499446473528487 | 0.74853144468691012 | 0.5000000000000000  |
| 0.7499672570651800 | 0.2507253310749158  | 0.5000000000000000  |
| 0.7490062103845762 | 0.7496294486260708  | 0.5000000000000000  |
| 0.4546637776595724 | 0.2034317749455007  | 0.5000000000000000  |
| 0.4542402389897982 | 0.7005308539131536  | 0.5000000000000000  |
| 0.9541209157553997 | 0.2034669269873604  | 0.5000000000000000  |
| 0.9535425287624456 | 0.7035120161821078  | 0.5000000000000000  |
| 0.0466734806993951 | 0.2958299733338349  | 0.5000000000000000  |
| 0.0459485708460830 | 0.7960085503555453  | 0.5000000000000000  |
| 0.5457926256484091 | 0.2984381309930594  | 0.5000000000000000  |
| 0.5454075249615070 | 0.7954842532811406  | 0.5000000000000000  |
| 0.2991447632971386 | 0.4537715208047687  | 0.5000000000000000  |
| 0.2960690459084628 | 0.9528660635290676  | 0.5000000000000000  |
| 0.7959364023361045 | 0.4541584236478378  | 0.5000000000000000  |
| 0.7963040499683989 | 0.9536395277235029  | 0.5000000000000000  |
| 0.2038856720336628 | 0.0456172797634987  | 0.5000000000000000  |
| 0.2041626397843133 | 0.5450258479977936  | 0.5000000000000000  |
| 0.7039118111126375 | 0.0461696992510080  | 0.5000000000000000  |
| 0.7010728252159073 | 0.5455158058330420  | 0.5000000000000000  |
| 0.5000901348094080 | 0.4995331473020648  | 0.5000000000000000  |

---

Fe/VPt-PtN2

1.0000000000000000

|                    |                    |                     |
|--------------------|--------------------|---------------------|
| 9.6017120604568156 | 0.0000000000000000 | 0.0000000000000000  |
| 0.0000000000000000 | 9.650699615500007  | 0.0000000000000000  |
| 0.0000000000000000 | 0.0000000000000000 | 20.0000000000000000 |

Pt N Fe  
7 16 1

Direct

|                     |                     |                    |
|---------------------|---------------------|--------------------|
| -0.0000220263122417 | -0.0002224108195338 | 0.5000000000000000 |
| 0.0001678689341835  | 0.4996684304689245  | 0.5000000000000000 |
| 0.5000091691455232  | -0.0007228636732179 | 0.5000000000000000 |
| 0.2517298326064185  | 0.2503387853735466  | 0.5000000000000000 |
| 0.2507960508292803  | 0.7479315340191335  | 0.5000000000000000 |
| 0.7492057257360734  | 0.2513496610885277  | 0.5000000000000000 |

---

---

|                    |                    |                    |
|--------------------|--------------------|--------------------|
| 0.7484315714764753 | 0.7488377736452513 | 0.5000000000000000 |
| 0.4552690557575282 | 0.2057031150438248 | 0.5000000000000000 |
| 0.4553044034974255 | 0.6972630081600147 | 0.5000000000000000 |
| 0.9539435424575325 | 0.2038911297207914 | 0.5000000000000000 |
| 0.9538178509720480 | 0.7035546685968683 | 0.5000000000000000 |
| 0.0463689242361700 | 0.2959787779914022 | 0.5000000000000000 |
| 0.0461308581276843 | 0.7957551440298768 | 0.5000000000000000 |
| 0.5446467330933851 | 0.3014139551343671 | 0.5000000000000000 |
| 0.5447171443812543 | 0.7929344741809377 | 0.5000000000000000 |
| 0.3023056259770834 | 0.4549743843689280 | 0.5000000000000000 |
| 0.2960857228578250 | 0.9532099344407826 | 0.5000000000000000 |
| 0.7935721732818607 | 0.4548438986169611 | 0.5000000000000000 |
| 0.7958651513248103 | 0.9534928337219275 | 0.5000000000000000 |
| 0.2041689051203529 | 0.0458255395015785 | 0.5000000000000000 |
| 0.2066754804358035 | 0.5444960366952141 | 0.5000000000000000 |
| 0.7038406432380943 | 0.0460072764006755 | 0.5000000000000000 |
| 0.6980559527791440 | 0.5445307902110671 | 0.5000000000000000 |
| 0.5001736224762348 | 0.4990841291655231 | 0.5000000000000000 |

---

Co/VPt-PtN2

1.0000000000000000

|                    |                    |                     |
|--------------------|--------------------|---------------------|
| 9.5823576041283509 | 0.0000000000000000 | 0.0000000000000000  |
| 0.0000000000000000 | 9.6506996155000007 | 0.0000000000000000  |
| 0.0000000000000000 | 0.0000000000000000 | 20.0000000000000000 |

Pt    N    Co  
7    16    1

Direct

|                     |                     |                    |
|---------------------|---------------------|--------------------|
| -0.0000157088339321 | -0.0003373964630557 | 0.5000000000000000 |
| 0.0001622893284223  | 0.4996413571489052  | 0.5000000000000000 |
| 0.4999406771379450  | -0.0006362787933139 | 0.5000000000000000 |
| 0.2522253090204233  | 0.2511222115999678  | 0.5000000000000000 |
| 0.2514468536152487  | 0.7473438383937980  | 0.5000000000000000 |
| 0.7486997285383399  | 0.2517889671653027  | 0.5000000000000000 |
| 0.7478700808610923  | 0.7480833425651797  | 0.5000000000000000 |
| 0.4559726534626290  | 0.2075380302768277  | 0.5000000000000000 |
| 0.4555252289482897  | 0.6952849395104240  | 0.5000000000000000 |
| 0.9539096826104697  | 0.2041656655731781  | 0.5000000000000000 |
| 0.9538334286003821  | 0.7033762287396623  | 0.5000000000000000 |
| 0.0463426760781639  | 0.2960314251187283  | 0.5000000000000000 |
| 0.0462102742571458  | 0.7952911559158979  | 0.5000000000000000 |
| 0.5445717302938434  | 0.3036638658497571  | 0.5000000000000000 |
| 0.5440935718534334  | 0.7914282706832532  | 0.5000000000000000 |
| 0.3044500458646815  | 0.4550631408621230  | 0.5000000000000000 |
| 0.2960524106161344  | 0.9531939829235289  | 0.5000000000000000 |

---

|                    |                    |                    |
|--------------------|--------------------|--------------------|
| 0.7919297374760667 | 0.4553711913026148 | 0.5000000000000000 |
| 0.7954624163743294 | 0.9532799439098621 | 0.5000000000000000 |
| 0.2045098889071404 | 0.0459699788196683 | 0.5000000000000000 |
| 0.2083494890621902 | 0.5438801189848383 | 0.5000000000000000 |
| 0.7038182127195094 | 0.0459381265873531 | 0.5000000000000000 |
| 0.6958029429273593 | 0.5441536108297257 | 0.5000000000000000 |
| 0.5000963627106414 | 0.4995042885791450 | 0.5000000000000000 |

---

Ni/VPt-PtN2

1.0000000000000000

|                    |                    |                     |
|--------------------|--------------------|---------------------|
| 9.5801736802307893 | 0.0000000000000000 | 0.0000000000000000  |
| 0.0000000000000000 | 9.6506996155000007 | 0.0000000000000000  |
| 0.0000000000000000 | 0.0000000000000000 | 20.0000000000000000 |

Pt N Ni  
7 16 1

Direct

|                    |                     |                    |
|--------------------|---------------------|--------------------|
| 0.0000240707995993 | -0.0004186014807950 | 0.5000000000000000 |
| 0.0001386658769515 | 0.4995593691205065  | 0.5000000000000000 |
| 0.5000054169780638 | -0.0005088022118347 | 0.5000000000000000 |
| 0.2520399332067624 | 0.2504639620871885  | 0.5000000000000000 |
| 0.2508536309329574 | 0.7475732892714854  | 0.5000000000000000 |
| 0.7492100057491765 | 0.2515868296110562  | 0.5000000000000000 |
| 0.7480430979589312 | 0.7487301046692937  | 0.5000000000000000 |
| 0.4555776219463138 | 0.2075563485558512  | 0.5000000000000000 |
| 0.4546654224745469 | 0.6967161623478076  | 0.5000000000000000 |
| 0.9538862296689418 | 0.2034831128219836  | 0.5000000000000000 |
| 0.9537095529971943 | 0.7030915285328176  | 0.5000000000000000 |
| 0.0464013734973897 | 0.2961348093373241  | 0.5000000000000000 |
| 0.0461910140447430 | 0.7957764747793545  | 0.5000000000000000 |
| 0.5454426787784930 | 0.3023692969337713  | 0.5000000000000000 |
| 0.5444906995888286 | 0.7915614612656536  | 0.5000000000000000 |
| 0.3031587588555674 | 0.4541922937945245  | 0.5000000000000000 |
| 0.2963323914622378 | 0.9531681175456963  | 0.5000000000000000 |
| 0.7918138609900480 | 0.4549862577232412  | 0.5000000000000000 |
| 0.7960352429811323 | 0.9532922101721016  | 0.5000000000000000 |
| 0.2040081522564609 | 0.0459840532188119  | 0.5000000000000000 |
| 0.2084056672362952 | 0.5442430996145405  | 0.5000000000000000 |
| 0.7036777679974350 | 0.0460661973199697  | 0.5000000000000000 |
| 0.6970479587986258 | 0.5449994362362099  | 0.5000000000000000 |
| 0.5001007673532556 | 0.4995329948168120  | 0.5000000000000000 |

---

Cu/VPt-PtN2

1.0000000000000000

|                    |                    |                    |
|--------------------|--------------------|--------------------|
| 9.6255736969971899 | 0.0000000000000000 | 0.0000000000000000 |
|--------------------|--------------------|--------------------|

---

---

|                    |                     |                     |
|--------------------|---------------------|---------------------|
| 0.0000000000000000 | 9.650699615500007   | 0.0000000000000000  |
| 0.0000000000000000 | 0.0000000000000000  | 20.0000000000000000 |
| Pt                 | N                   | Cu                  |
| 7                  | 16                  | 1                   |
| Direct             |                     |                     |
| 0.0000119696313932 | -0.0003091176885948 | 0.5000000000000000  |
| 0.0001742395882813 | 0.4996129533452585  | 0.5000000000000000  |
| 0.5000183619634605 | -0.0007615138359078 | 0.5000000000000000  |
| 0.2507819410678852 | 0.2496482032542561  | 0.5000000000000000  |
| 0.2499985512891679 | 0.7490141187438829  | 0.5000000000000000  |
| 0.7500425706466973 | 0.2504320630913210  | 0.5000000000000000  |
| 0.7493575245672247 | 0.7496036330903717  | 0.5000000000000000  |
| 0.4548527726995892 | 0.2054635105185008  | 0.5000000000000000  |
| 0.4532679986981614 | 0.7019267408417144  | 0.5000000000000000  |
| 0.9542266311446160 | 0.2032003840365954  | 0.5000000000000000  |
| 0.9537743315515813 | 0.7030768590419010  | 0.5000000000000000  |
| 0.0464360018969086 | 0.2963315701575807  | 0.5000000000000000  |
| 0.0458663914040049 | 0.7963230629039746  | 0.5000000000000000  |
| 0.5467224867829804 | 0.2969263851549916  | 0.5000000000000000  |
| 0.5452232032007108 | 0.7932978547593524  | 0.5000000000000000  |
| 0.2977769681487952 | 0.4528674626110240  | 0.5000000000000000  |
| 0.2965244043431919 | 0.9531674625699859  | 0.5000000000000000  |
| 0.7938354710224682 | 0.4544068011048958  | 0.5000000000000000  |
| 0.7965678078572496 | 0.9536856699704243  | 0.5000000000000000  |
| 0.2035213449931850 | 0.0455522228311503  | 0.5000000000000000  |
| 0.2063974626040040 | 0.5448955291799898  | 0.5000000000000000  |
| 0.7034299506408148 | 0.0459239166342628  | 0.5000000000000000  |
| 0.7024021957381061 | 0.5463754727067530  | 0.5000000000000000  |
| 0.5000494009494727 | 0.4994787610596881  | 0.5000000000000000  |

---

Zn/VPt-PtN2

1.0000000000000000

|                    |                    |                     |
|--------------------|--------------------|---------------------|
| 9.6945267714270411 | 0.0000000000000000 | 0.0000000000000000  |
| 0.0000000000000000 | 9.650699615500007  | 0.0000000000000000  |
| 0.0000000000000000 | 0.0000000000000000 | 20.0000000000000000 |

Pt N Zn  
7 16 1

Direct

|                    |                     |                    |
|--------------------|---------------------|--------------------|
| 0.0000841449366626 | -0.0003937233292184 | 0.5000000000000000 |
| 0.0000644566374186 | 0.4994533720020184  | 0.5000000000000000 |
| 0.5000525303932454 | -0.0005831458672788 | 0.5000000000000000 |
| 0.2496725703416349 | 0.2504265607366916  | 0.5000000000000000 |
| 0.2507518956658664 | 0.7498547904979999  | 0.5000000000000000 |
| 0.7492395661972031 | 0.2493742149103495  | 0.5000000000000000 |

---

---

|                    |                    |                    |
|--------------------|--------------------|--------------------|
| 0.7505836959222609 | 0.7488397480766142 | 0.5000000000000000 |
| 0.4548270832093814 | 0.2028742645509768 | 0.5000000000000000 |
| 0.4529335725119105 | 0.7057756546803636 | 0.5000000000000000 |
| 0.9540888562205738 | 0.2035083381059949 | 0.5000000000000000 |
| 0.9539723424839984 | 0.7036067056031439 | 0.5000000000000000 |
| 0.0461620821374738 | 0.2955698632949105 | 0.5000000000000000 |
| 0.0459569881612818 | 0.7957633068889125 | 0.5000000000000000 |
| 0.5470724848637413 | 0.2933770795975269 | 0.5000000000000000 |
| 0.5452298024387022 | 0.7962242410817606 | 0.5000000000000000 |
| 0.2933894763497407 | 0.4526554400496316 | 0.5000000000000000 |
| 0.2961740691358185 | 0.9534881909250233 | 0.5000000000000000 |
| 0.7971839378362692 | 0.4543992231922646 | 0.5000000000000000 |
| 0.7962537612244414 | 0.9538788691793995 | 0.5000000000000000 |
| 0.2039879042909134 | 0.0453772421471555 | 0.5000000000000000 |
| 0.2028455306055776 | 0.5447494162182178 | 0.5000000000000000 |
| 0.7039575496428497 | 0.0456416140109921 | 0.5000000000000000 |
| 0.7067383111559615 | 0.5465929026197517 | 0.5000000000000000 |
| 0.5000373700670230 | 0.4996858369101705 | 0.5000000000000000 |

---

Nb/VPt-PtN2

1.0000000000000000

|                    |                    |                     |
|--------------------|--------------------|---------------------|
| 9.7222426856991646 | 0.0000000000000000 | 0.0000000000000000  |
| 0.0000000000000000 | 9.6506996155000007 | 0.0000000000000000  |
| 0.0000000000000000 | 0.0000000000000000 | 20.0000000000000000 |

Pt    N    Nb  
7    16    1

Direct

|                     |                     |                    |
|---------------------|---------------------|--------------------|
| 0.0037889834368324  | 0.0025818552543013  | 0.5000000000000000 |
| -0.0064739871733455 | 0.5037891049930763  | 0.5000000000000000 |
| 0.5030940206693330  | -0.0052832499756192 | 0.5000000000000000 |
| 0.2572488974565555  | 0.2563596180688296  | 0.5000000000000000 |
| 0.2460001182139529  | 0.7542825748103865  | 0.5000000000000000 |
| 0.7580618169644681  | 0.2459400473279884  | 0.5000000000000000 |
| 0.7489913127621727  | 0.7488119543795306  | 0.5000000000000000 |
| 0.4611578097019787  | 0.1950629929730829  | 0.5000000000000000 |
| 0.4530287606749311  | 0.7001243527490661  | 0.5000000000000000 |
| 0.9613377343986041  | 0.2061495220295884  | 0.5000000000000000 |
| 0.9511711984822320  | 0.7076917727968635  | 0.5000000000000000 |
| 0.0511247877624522  | 0.3001604212456303  | 0.5000000000000000 |
| 0.0436109899958915  | 0.7990023119608434  | 0.5000000000000000 |
| 0.5604696802663917  | 0.2833082042786240  | 0.5000000000000000 |
| 0.5451030449307770  | 0.7936301231901700  | 0.5000000000000000 |
| 0.2832793516055748  | 0.4677478391805587  | 0.5000000000000000 |
| 0.2981464588310280  | 0.9555920846925027  | 0.5000000000000000 |

---

---

|                    |                    |                    |
|--------------------|--------------------|--------------------|
| 0.7953092705782715 | 0.4540303641358349 | 0.5000000000000000 |
| 0.8006412074157926 | 0.9515341201091748 | 0.5000000000000000 |
| 0.2087536238407231 | 0.0506152489300202 | 0.5000000000000000 |
| 0.1868913678991167 | 0.5569541310958764 | 0.5000000000000000 |
| 0.7091112332040072 | 0.0431302098099694 | 0.5000000000000000 |
| 0.6996120011976757 | 0.5445879837180597 | 0.5000000000000000 |
| 0.4818002993145334 | 0.4743364183290136 | 0.5000000000000000 |

---

Mo/VPt-PtN2

1.0000000000000000

|                    |                    |                     |
|--------------------|--------------------|---------------------|
| 9.7262648072224813 | 0.0000000000000000 | 0.0000000000000000  |
| 0.0000000000000000 | 9.6506996155000007 | 0.0000000000000000  |
| 0.0000000000000000 | 0.0000000000000000 | 20.0000000000000000 |

Pt N Mo  
7 16 1

Direct

|                    |                     |                    |
|--------------------|---------------------|--------------------|
| 0.0000690389937986 | -0.0003598464579234 | 0.5000000000000000 |
| 0.0000057693537079 | 0.4996291887146488  | 0.5000000000000000 |
| 0.5000579571559057 | -0.0006176967611826 | 0.5000000000000000 |
| 0.2491442479939714 | 0.2493878254814713  | 0.5000000000000000 |
| 0.2492126192305084 | 0.7506467190716606  | 0.5000000000000000 |
| 0.7508427211007332 | 0.2485909099491063  | 0.5000000000000000 |
| 0.7510526790481903 | 0.7498888765655545  | 0.5000000000000000 |
| 0.4535412642799924 | 0.1995434585116838  | 0.5000000000000000 |
| 0.4534071641293955 | 0.7082754114696364  | 0.5000000000000000 |
| 0.9547484191907619 | 0.2036528409409547  | 0.5000000000000000 |
| 0.9536718249554850 | 0.7041798209742262  | 0.5000000000000000 |
| 0.0464382220423222 | 0.2952090421360897  | 0.5000000000000000 |
| 0.0453822870911766 | 0.7957141972258512  | 0.5000000000000000 |
| 0.5465993011737547 | 0.2906492757150999  | 0.5000000000000000 |
| 0.5465464950612965 | 0.7993336313416970  | 0.5000000000000000 |
| 0.2912832813498245 | 0.4539150465968404  | 0.5000000000000000 |
| 0.2955711722065941 | 0.9535626278766365  | 0.5000000000000000 |
| 0.8004494230966644 | 0.4529287035802073  | 0.5000000000000000 |
| 0.7962554093421972 | 0.9541188704199024  | 0.5000000000000000 |
| 0.2039673352944890 | 0.0451497849378388  | 0.5000000000000000 |
| 0.1995891134742195 | 0.5463406337517187  | 0.5000000000000000 |
| 0.7045577535156559 | 0.0455959869485401  | 0.5000000000000000 |
| 0.7088068695236212 | 0.5453792861097821  | 0.5000000000000000 |
| 0.5000596138256843 | 0.4994254109833326  | 0.5000000000000000 |

---

Tc/VPt-PtN2

1.0000000000000000

|                    |                    |                    |
|--------------------|--------------------|--------------------|
| 9.6922537735852874 | 0.0000000000000000 | 0.0000000000000000 |
|--------------------|--------------------|--------------------|

---

---

|                    |                    |                     |
|--------------------|--------------------|---------------------|
| 0.0000000000000000 | 9.650699615500007  | 0.0000000000000000  |
| 0.0000000000000000 | 0.0000000000000000 | 20.0000000000000000 |
| Pt                 | N                  | Tc                  |
| 7                  | 16                 | 1                   |

Direct

|                     |                     |                    |
|---------------------|---------------------|--------------------|
| 0.0001672344598807  | -0.0000451060066855 | 0.5000000000000000 |
| -0.0000027262445648 | 0.4999428447031504  | 0.5000000000000000 |
| 0.5000422161013482  | -0.0010152078549088 | 0.5000000000000000 |
| 0.2499342812268922  | 0.2495802121715323  | 0.5000000000000000 |
| 0.2497438864924664  | 0.7500124842796677  | 0.5000000000000000 |
| 0.7503759595372516  | 0.2494015136930922  | 0.5000000000000000 |
| 0.7502245998454855  | 0.7498182700951894  | 0.5000000000000000 |
| 0.4536764897926492  | 0.2002132416558813  | 0.5000000000000000 |
| 0.4545223994487494  | 0.7049045129370054  | 0.5000000000000000 |
| 0.9544956139585503  | 0.2040716747166327  | 0.5000000000000000 |
| 0.9538564871134134  | 0.7042629053518017  | 0.5000000000000000 |
| 0.0463944428931252  | 0.2957549023056311  | 0.5000000000000000 |
| 0.0457143746766507  | 0.7959343683345517  | 0.5000000000000000 |
| 0.5455575614830682  | 0.2930388927265908  | 0.5000000000000000 |
| 0.5461802177323374  | 0.7977888045991626  | 0.5000000000000000 |
| 0.2942114850391181  | 0.4549283162673585  | 0.5000000000000000 |
| 0.2957647967918470  | 0.9535650102587733  | 0.5000000000000000 |
| 0.7989302601562339  | 0.4535765698078691  | 0.5000000000000000 |
| 0.7961532299931052  | 0.9540524475378352  | 0.5000000000000000 |
| 0.2041892962338375  | 0.0454615267305072  | 0.5000000000000000 |
| 0.2010396066098804  | 0.5461857736716194  | 0.5000000000000000 |
| 0.7043120164963267  | 0.0456483017288284  | 0.5000000000000000 |
| 0.7057752520430018  | 0.5448675275560676  | 0.5000000000000000 |
| 0.5000010005492960  | 0.4981902188162185  | 0.5000000000000000 |

---

Ru/VPt-PtN2

1.0000000000000000

|                    |                    |                     |
|--------------------|--------------------|---------------------|
| 9.6780850925254551 | 0.0000000000000000 | 0.0000000000000000  |
| 0.0000000000000000 | 9.650699615500007  | 0.0000000000000000  |
| 0.0000000000000000 | 0.0000000000000000 | 20.0000000000000000 |

|    |    |    |
|----|----|----|
| Pt | N  | Ru |
| 7  | 16 | 1  |

Direct

|                     |                     |                    |
|---------------------|---------------------|--------------------|
| -0.0000250079161750 | -0.0000496235927323 | 0.5000000000000000 |
| 0.0000730710653685  | 0.4996652556860230  | 0.5000000000000000 |
| 0.5000549273458674  | -0.0009931144668577 | 0.5000000000000000 |
| 0.2500322459591028  | 0.2504396407943049  | 0.5000000000000000 |
| 0.2505936985144966  | 0.7498097696328793  | 0.5000000000000000 |
| 0.7492623017032586  | 0.2495380467819371  | 0.5000000000000000 |

---

---

|                    |                    |                    |
|--------------------|--------------------|--------------------|
| 0.7502392842668630 | 0.7490416559197816 | 0.5000000000000000 |
| 0.4546713418941876 | 0.2026291689153762 | 0.5000000000000000 |
| 0.4554920782981779 | 0.7020949634939353 | 0.5000000000000000 |
| 0.9544004778861093 | 0.2045481099465805 | 0.5000000000000000 |
| 0.9542026403221363 | 0.7041030432836310 | 0.5000000000000000 |
| 0.0460502991169228 | 0.2955969940167792 | 0.5000000000000000 |
| 0.0456818897845242 | 0.7953020554805977 | 0.5000000000000000 |
| 0.5446735532495408 | 0.2959050964145256 | 0.5000000000000000 |
| 0.5452631197890988 | 0.7955284584229324 | 0.5000000000000000 |
| 0.2971824138971088 | 0.4556387369689152 | 0.5000000000000000 |
| 0.2957848447831362 | 0.9538149987622796 | 0.5000000000000000 |
| 0.7965302459255093 | 0.4545208079942560 | 0.5000000000000000 |
| 0.7954645401365801 | 0.9540649385682173 | 0.5000000000000000 |
| 0.2045996392153163 | 0.0453105289438738 | 0.5000000000000000 |
| 0.2034693635329176 | 0.5450766229353589 | 0.5000000000000000 |
| 0.7041735072512579 | 0.0455137696212575 | 0.5000000000000000 |
| 0.7032553505203833 | 0.5445955808866183 | 0.5000000000000000 |
| 0.5001341558882616 | 0.4984445006729025 | 0.5000000000000000 |

---



---

Rh/VPt-PtN2

1.0

|              |              |               |
|--------------|--------------|---------------|
| 9.6623001099 | 0.0000000000 | 0.0000000000  |
| 0.0000000000 | 9.6506996155 | 0.0000000000  |
| 0.0000000000 | 0.0000000000 | 20.0000000000 |

|    |    |    |
|----|----|----|
| Pt | N  | Rh |
| 7  | 16 | 1  |

Direct

|             |             |             |
|-------------|-------------|-------------|
| 0.000050000 | 0.999700010 | 0.500000000 |
| 0.000130000 | 0.499540001 | 0.500000000 |
| 0.499969989 | 0.999349952 | 0.500000000 |
| 0.250250012 | 0.250389993 | 0.500000000 |
| 0.250690013 | 0.749430001 | 0.500000000 |
| 0.749310017 | 0.249750018 | 0.500000000 |
| 0.749949992 | 0.749029994 | 0.500000000 |
| 0.454860002 | 0.203850001 | 0.500000000 |
| 0.455080003 | 0.702260017 | 0.500000000 |
| 0.954259992 | 0.204180002 | 0.500000000 |
| 0.954150021 | 0.703840017 | 0.500000000 |
| 0.046000000 | 0.295500010 | 0.500000000 |
| 0.045820002 | 0.795220017 | 0.500000000 |
| 0.545000017 | 0.296579987 | 0.500000000 |
| 0.545159996 | 0.795050025 | 0.500000000 |
| 0.297289997 | 0.454710037 | 0.500000000 |
| 0.295850009 | 0.953670025 | 0.500000000 |

---

|             |             |             |
|-------------|-------------|-------------|
| 0.795729995 | 0.454470009 | 0.500000000 |
| 0.795589983 | 0.953889966 | 0.500000000 |
| 0.204520002 | 0.045440000 | 0.500000000 |
| 0.204439998 | 0.544790030 | 0.500000000 |
| 0.704129994 | 0.045520000 | 0.500000000 |
| 0.702920020 | 0.544579983 | 0.500000000 |
| 0.500109971 | 0.499399960 | 0.500000000 |

---

Pd/VPt-PtN2

1.000000000000000

|                    |                    |                     |
|--------------------|--------------------|---------------------|
| 9.6607164967498687 | 0.0000000000000000 | 0.0000000000000000  |
| 0.0000000000000000 | 9.6506996155000007 | 0.0000000000000000  |
| 0.0000000000000000 | 0.0000000000000000 | 20.0000000000000000 |

Pt N Pd  
7 16 1

Direct

|                    |                     |                    |
|--------------------|---------------------|--------------------|
| 0.0000611296031294 | -0.0004539520585394 | 0.5000000000000000 |
| 0.0000651632984174 | 0.4995044562628464  | 0.5000000000000000 |
| 0.5000726526615694 | -0.0004840210869832 | 0.5000000000000000 |
| 0.2500021322782374 | 0.2495787299930446  | 0.5000000000000000 |
| 0.2499534542005733 | 0.7496257796299045  | 0.5000000000000000 |
| 0.7500815932924326 | 0.2495174539959161  | 0.5000000000000000 |
| 0.7501633062572420 | 0.7495695972951110  | 0.5000000000000000 |
| 0.4541671268302189 | 0.2036434776284292  | 0.5000000000000000 |
| 0.4534441433854497 | 0.7047430354429253  | 0.5000000000000000 |
| 0.9540280856014566 | 0.2033796690176801  | 0.5000000000000000 |
| 0.9539199947592312 | 0.7034660954668476  | 0.5000000000000000 |
| 0.0462055491359849 | 0.2956792731030763  | 0.5000000000000000 |
| 0.0460487112711057 | 0.7958125619855899  | 0.5000000000000000 |
| 0.5466043246271767 | 0.2944878822358504  | 0.5000000000000000 |
| 0.5459618814997986 | 0.7955017432828638  | 0.5000000000000000 |
| 0.2949489264447804 | 0.4530893063329227  | 0.5000000000000000 |
| 0.2961678358222581 | 0.9535190789219112  | 0.5000000000000000 |
| 0.7960335380812243 | 0.4536461076791975  | 0.5000000000000000 |
| 0.7963299349244574 | 0.9536016052368825  | 0.5000000000000000 |
| 0.2038012394217308 | 0.0456776991900321  | 0.5000000000000000 |
| 0.2040343128587737 | 0.5455142561288773  | 0.5000000000000000 |
| 0.7039159337472147 | 0.0457226300074943  | 0.5000000000000000 |
| 0.7052028659147500 | 0.5461498579839192  | 0.5000000000000000 |
| 0.5000461465127369 | 0.4996476824075741  | 0.5000000000000000 |

---

Ag/VPt-PtN2

1.000000000000000

|                    |                    |                    |
|--------------------|--------------------|--------------------|
| 9.6811438475739333 | 0.0000000000000000 | 0.0000000000000000 |
|--------------------|--------------------|--------------------|

---

---

|                    |                     |                     |
|--------------------|---------------------|---------------------|
| 0.0000000000000000 | 9.650699615500007   | 0.0000000000000000  |
| 0.0000000000000000 | 0.0000000000000000  | 20.0000000000000000 |
| Pt                 | N                   | Ag                  |
| 7                  | 16                  | 1                   |
| Direct             |                     |                     |
| 0.0000562311417341 | -0.0005006789577712 | 0.5000000000000000  |
| 0.0000451059235404 | 0.4994588975307894  | 0.5000000000000000  |
| 0.5001291492889992 | -0.0004925538881206 | 0.5000000000000000  |
| 0.2488074059678272 | 0.2481116790314246  | 0.5000000000000000  |
| 0.2484144857906643 | 0.7508203048492790  | 0.5000000000000000  |
| 0.7515812082246696 | 0.2484006395026630  | 0.5000000000000000  |
| 0.7513709785578387 | 0.7510403069269975  | 0.5000000000000000  |
| 0.4528683183302788 | 0.2022655082111030  | 0.5000000000000000  |
| 0.4513935921797008 | 0.7097993239954986  | 0.5000000000000000  |
| 0.9541379831774015 | 0.2022857662879990  | 0.5000000000000000  |
| 0.9538763010801830 | 0.7030782331792093  | 0.5000000000000000  |
| 0.0462496986442413 | 0.2959954941906006  | 0.5000000000000000  |
| 0.0459653702369326 | 0.7968446794646745  | 0.5000000000000000  |
| 0.5486535408663124 | 0.2895453047675985  | 0.5000000000000000  |
| 0.5472691144175356 | 0.7969518773635405  | 0.5000000000000000  |
| 0.2898530525245699 | 0.4511441636855021  | 0.5000000000000000  |
| 0.2965420988180541 | 0.9535048377802777  | 0.5000000000000000  |
| 0.7976487877719608 | 0.4523647122556301  | 0.5000000000000000  |
| 0.7973824290848361 | 0.9537351911118503  | 0.5000000000000000  |
| 0.2026945851489237 | 0.0454871153032799  | 0.5000000000000000  |
| 0.2024359694919473 | 0.5467907220994699  | 0.5000000000000000  |
| 0.7035514080365506 | 0.0457170088045079  | 0.5000000000000000  |
| 0.7102866692603398 | 0.5480994700928248  | 0.5000000000000000  |
| 0.5000464984649089 | 0.4996920024945433  | 0.5000000000000000  |

---

Ta/VPt-PtN2

|                    |                    |                     |
|--------------------|--------------------|---------------------|
| 1.0000000000000000 |                    |                     |
| 9.7116874297154432 | 0.0000000000000000 | 0.0000000000000000  |
| 0.0000000000000000 | 9.650699615500007  | 0.0000000000000000  |
| 0.0000000000000000 | 0.0000000000000000 | 20.0000000000000000 |

Pt N Ta  
7 16 1

Direct

|                     |                     |                    |
|---------------------|---------------------|--------------------|
| 0.0037225366995622  | 0.0025153552872152  | 0.5000000000000000 |
| -0.0065040880391542 | 0.5034238302524526  | 0.5000000000000000 |
| 0.5028048675453047  | -0.0050368391098525 | 0.5000000000000000 |
| 0.2568560908453396  | 0.2553645370649253  | 0.5000000000000000 |
| 0.2459023800157530  | 0.7534302726306217  | 0.5000000000000000 |
| 0.7574928007715850  | 0.2460247567245364  | 0.5000000000000000 |

---

---

|                    |                    |                    |
|--------------------|--------------------|--------------------|
| 0.7492330407465684 | 0.7494053460360208 | 0.5000000000000000 |
| 0.4601063628336340 | 0.1946262029560413 | 0.5000000000000000 |
| 0.4541166193011730 | 0.6995836218663667 | 0.5000000000000000 |
| 0.9608047899712909 | 0.2059258806825454 | 0.5000000000000000 |
| 0.9512788831390706 | 0.7075084533494153 | 0.5000000000000000 |
| 0.0509168200905193 | 0.2998400474846373 | 0.5000000000000000 |
| 0.0439933360802028 | 0.7988474871912924 | 0.5000000000000000 |
| 0.5595055547349048 | 0.2840592495084583 | 0.5000000000000000 |
| 0.5460195070329412 | 0.7943829217724151 | 0.5000000000000000 |
| 0.2840742222413419 | 0.4667890937510126 | 0.5000000000000000 |
| 0.2980549769923485 | 0.9549938669933583 | 0.5000000000000000 |
| 0.7950704058383983 | 0.4538905872663653 | 0.5000000000000000 |
| 0.8006141952956208 | 0.9518088834971671 | 0.5000000000000000 |
| 0.2084146101932887 | 0.0499902991347606 | 0.5000000000000000 |
| 0.1867479232642482 | 0.5561815196053647 | 0.5000000000000000 |
| 0.7088817825337248 | 0.0434968018359911 | 0.5000000000000000 |
| 0.6991247576955584 | 0.5456032690629912 | 0.5000000000000000 |
| 0.4840276066067259 | 0.4774845612392705 | 0.5000000000000000 |

---

W/VPt-PtN2

1.0000000000000000

|                    |                    |                     |
|--------------------|--------------------|---------------------|
| 9.6774598454318230 | 0.0000000000000000 | 0.0000000000000000  |
| 0.0000000000000000 | 9.6506996155000007 | 0.0000000000000000  |
| 0.0000000000000000 | 0.0000000000000000 | 20.0000000000000000 |

Pt N W  
7 16 1

Direct

|                     |                     |                    |
|---------------------|---------------------|--------------------|
| 0.0035233079058577  | 0.0031893153896308  | 0.5000000000000000 |
| -0.0065383931212035 | 0.5036043038412125  | 0.5000000000000000 |
| 0.5031484255656761  | -0.0064541952885534 | 0.5000000000000000 |
| 0.2591439565034021  | 0.2563205130890291  | 0.5000000000000000 |
| 0.2460342728863556  | 0.7546421837210394  | 0.5000000000000000 |
| 0.7567375324938784  | 0.2464535324054681  | 0.5000000000000000 |
| 0.7485901593342992  | 0.7483520586027055  | 0.5000000000000000 |
| 0.4608939048847954  | 0.1939780062196424  | 0.5000000000000000 |
| 0.4547326760607068  | 0.6960404904717150  | 0.5000000000000000 |
| 0.9609004242335483  | 0.2066678566546758  | 0.5000000000000000 |
| 0.9516898258987074  | 0.7076386502913721  | 0.5000000000000000 |
| 0.0510302187805888  | 0.3006323771959989  | 0.5000000000000000 |
| 0.0439870709598893  | 0.7993988865879269  | 0.5000000000000000 |
| 0.5574735997174858  | 0.2852462014740875  | 0.5000000000000000 |
| 0.5455165525627859  | 0.7911161480729402  | 0.5000000000000000 |
| 0.2873787171434317  | 0.4702883901870895  | 0.5000000000000000 |
| 0.2982355106743674  | 0.9559402375438846  | 0.5000000000000000 |

---

---

|                    |                    |                    |
|--------------------|--------------------|--------------------|
| 0.7930193553588354 | 0.4538954488584511 | 0.5000000000000000 |
| 0.8004570591760948 | 0.9511763104811189 | 0.5000000000000000 |
| 0.2085341910405224 | 0.0512078908359949 | 0.5000000000000000 |
| 0.1886461386639904 | 0.5570334476014078 | 0.5000000000000000 |
| 0.7083205026870762 | 0.0428216582414015 | 0.5000000000000000 |
| 0.6961887114574318 | 0.5446591599420602 | 0.5000000000000000 |
| 0.4836162615614251 | 0.4762911336630723 | 0.5000000000000000 |

---

Re/VPt-PtN2

1.0000000000000000

|                    |                    |                     |
|--------------------|--------------------|---------------------|
| 9.6789562858357421 | 0.0000000000000000 | 0.0000000000000000  |
| 0.0000000000000000 | 9.6506996155000007 | 0.0000000000000000  |
| 0.0000000000000000 | 0.0000000000000000 | 20.0000000000000000 |

Pt N Re  
7 16 1

Direct

|                    |                     |                    |
|--------------------|---------------------|--------------------|
| 0.0001485057510738 | -0.0003275113720130 | 0.5000000000000000 |
| 0.0000339948755162 | 0.4997033961690482  | 0.5000000000000000 |
| 0.5000949277600114 | -0.0007494350549420 | 0.5000000000000000 |
| 0.2498778277393107 | 0.2491332552562163  | 0.5000000000000000 |
| 0.2492985350495913 | 0.7499019078195976  | 0.5000000000000000 |
| 0.7507225464489160 | 0.2493527508893206  | 0.5000000000000000 |
| 0.7501681324406689 | 0.7501841291775287  | 0.5000000000000000 |
| 0.4532926938919434 | 0.1997459520847490  | 0.5000000000000000 |
| 0.4545694213793986 | 0.7042689310437754  | 0.5000000000000000 |
| 0.9543666974241835 | 0.2035555269060133  | 0.5000000000000000 |
| 0.9536634198795355 | 0.7039489991039983  | 0.5000000000000000 |
| 0.0464404579575845 | 0.2955432801082929  | 0.5000000000000000 |
| 0.0458124180901808 | 0.7958824879731113  | 0.5000000000000000 |
| 0.5454095698692011 | 0.2944389919807052  | 0.5000000000000000 |
| 0.5467938222945683 | 0.7988935144324489  | 0.5000000000000000 |
| 0.2952145056699410 | 0.4546521035564819  | 0.5000000000000000 |
| 0.2958662377573253 | 0.9533662676610716  | 0.5000000000000000 |
| 0.7996797273019829 | 0.4529348301868664  | 0.5000000000000000 |
| 0.7963290977628592 | 0.9538336184296275  | 0.5000000000000000 |
| 0.2038901904579201 | 0.0454726479580477  | 0.5000000000000000 |
| 0.2003640854477770 | 0.5465128286283210  | 0.5000000000000000 |
| 0.7042581212593860 | 0.0458242874560513  | 0.5000000000000000 |
| 0.7048927918906825 | 0.5447982390217184  | 0.5000000000000000 |
| 0.5000722540303907 | 0.4992690066673352  | 0.5000000000000000 |

---

Os/VPt-PtN2

1.0000000000000000

|                    |                    |                    |
|--------------------|--------------------|--------------------|
| 9.6770698556507320 | 0.0000000000000000 | 0.0000000000000000 |
|--------------------|--------------------|--------------------|

---

---

|                     |                     |                     |
|---------------------|---------------------|---------------------|
| 0.0000000000000000  | 9.650699615500007   | 0.0000000000000000  |
| 0.0000000000000000  | 0.0000000000000000  | 20.0000000000000000 |
| Pt                  | N                   | Os                  |
| 7                   | 16                  | 1                   |
| Direct              |                     |                     |
| -0.0003125872506990 | 0.0001476969993722  | 0.5000000000000000  |
| -0.0000188452096510 | 0.4995032006529444  | 0.5000000000000000  |
| 0.5001218357483401  | -0.0011462505466902 | 0.5000000000000000  |
| 0.2500333392707486  | 0.2504063037609173  | 0.5000000000000000  |
| 0.2502800481782909  | 0.7502741047250573  | 0.5000000000000000  |
| 0.7492693857792748  | 0.2494418764380789  | 0.5000000000000000  |
| 0.7505943509843535  | 0.7491858020870164  | 0.5000000000000000  |
| 0.4541952386802664  | 0.2017103779150542  | 0.5000000000000000  |
| 0.4560743158535462  | 0.7010682967818570  | 0.5000000000000000  |
| 0.9541624418859774  | 0.2046243439499782  | 0.5000000000000000  |
| 0.9543388364178655  | 0.7040772909357274  | 0.5000000000000000  |
| 0.0460577487085031  | 0.2955615191260007  | 0.5000000000000000  |
| 0.0457045172917147  | 0.7954375236705225  | 0.5000000000000000  |
| 0.5446062804532373  | 0.2959231938344419  | 0.5000000000000000  |
| 0.5458302730232578  | 0.7956217994980436  | 0.5000000000000000  |
| 0.2980562573642148  | 0.4568291548410465  | 0.5000000000000000  |
| 0.2957664269340765  | 0.9540740396275291  | 0.5000000000000000  |
| 0.7967804057654575  | 0.4541635475304356  | 0.5000000000000000  |
| 0.7954131619026323  | 0.9538462730993923  | 0.5000000000000000  |
| 0.2044490282388730  | 0.0455135094828172  | 0.5000000000000000  |
| 0.2028691013402341  | 0.5458339362318944  | 0.5000000000000000  |
| 0.7041400254869277  | 0.0455511360477454  | 0.5000000000000000  |
| 0.7028173336984346  | 0.5450210291371572  | 0.5000000000000000  |
| 0.5000310618840744  | 0.4974703002570323  | 0.5000000000000000  |

---

Ir/VPt-PN2

1.0000000000000000

|                    |                    |                     |
|--------------------|--------------------|---------------------|
| 9.6542889772417357 | 0.0000000000000000 | 0.0000000000000000  |
| 0.0000000000000000 | 9.650699615500007  | 0.0000000000000000  |
| 0.0000000000000000 | 0.0000000000000000 | 20.0000000000000000 |

Pt    N    Ir  
7    16    1

Direct

|                    |                     |                    |
|--------------------|---------------------|--------------------|
| 0.0000187251866264 | -0.0002903706057951 | 0.5000000000000000 |
| 0.0001604321983095 | 0.4995847602280408  | 0.5000000000000000 |
| 0.4999740157911164 | -0.0006937439251317 | 0.5000000000000000 |
| 0.2502885851644003 | 0.2504396565260970  | 0.5000000000000000 |
| 0.2506775200044565 | 0.7494721564118159  | 0.5000000000000000 |
| 0.7492464339508029 | 0.2497407943304957  | 0.5000000000000000 |

---

---

|                    |                    |                    |
|--------------------|--------------------|--------------------|
| 0.7499390914068893 | 0.7489554441981399 | 0.5000000000000000 |
| 0.4546555274193286 | 0.2037163308695483 | 0.5000000000000000 |
| 0.4555795387808840 | 0.7008893292305138 | 0.5000000000000000 |
| 0.9541823927867370 | 0.2044792386234558 | 0.5000000000000000 |
| 0.9541561728850650 | 0.7039226692253353 | 0.5000000000000000 |
| 0.0460113177930515 | 0.2954712576327888 | 0.5000000000000000 |
| 0.0459162088435154 | 0.7949886568715490 | 0.5000000000000000 |
| 0.5444683438032180 | 0.2979266134168408 | 0.5000000000000000 |
| 0.5454112823317486 | 0.7950949402596570 | 0.5000000000000000 |
| 0.2986777211663497 | 0.4552583147815542 | 0.5000000000000000 |
| 0.2957676352953422 | 0.9536919149899461 | 0.5000000000000000 |
| 0.7958037306096898 | 0.4542385889962420 | 0.5000000000000000 |
| 0.7952922307318038 | 0.9537700550785401 | 0.5000000000000000 |
| 0.2047762803267346 | 0.0455293915781620 | 0.5000000000000000 |
| 0.2044098920692759 | 0.5450169099944489 | 0.5000000000000000 |
| 0.7041802681498992 | 0.0454777280814303 | 0.5000000000000000 |
| 0.7015713896297840 | 0.5440374029015943 | 0.5000000000000000 |
| 0.5000952461049198 | 0.4994219663881042 | 0.5000000000000000 |

---
